# Supplementary material for: The MEK1/2 Pathway as a Therapeutic Target in High-Grade Serous Ovarian Carcinoma
Source: Cancers (Basel). 2021 Mar 18;13(6):1369. doi: 10.3390/cancers13061369 (PMC8003094; doi:10.3390/cancers13061369)

**Table S1.** List of primers used in RT-qPCR analysis.

| Gene           | Forward primer         | Reverse primer         |
|----------------|------------------------|------------------------|
| <i>TBP</i>     | GAGAGTTCTGGGATTGTACC   | GGATTATATTCGGCGTTTCG   |
| <i>PHLDA1</i>  | GGCAAGACAAGGTTTTGAGG   | TCGCAAGTTTTTCAGTAGGGTG |
| <i>SPRY2</i>   | TCCACTCAGCACAAACAC     | GATTATGCCATCAGCAACAG   |
| <i>SPRY4</i>   | CAACGGCTCTTAGACCAC     | CACACTCCTTGCAATTACAC   |
| <i>DUSP4</i>   | CCCCACTACACGACCAG      | TCCGAGGAGACATTCAACAG   |
| <i>DUSP6</i>   | GACGCTCGCTGTTTGTATC    | GCTTCTAATCCCTCCCTCC    |
| <i>CCND1</i>   | CTGGATGCTGGAGGTCTG     | GGTCTCCTTCATCTTAGAGGC  |
| <i>EPHA2</i>   | GTCAGCATCAACCAGACAGA   | TCCCTTCTTGCGGTAAGTG    |
| <i>EPHA4</i>   | CGGAGCGGAGAATGC        | TCCTTCCCAGACAGAGTAG    |
| <i>ETV4</i>    | AGGAGACATCAAGCAGGAAGGG | CCCAGAGCCTGGCGACC      |
| <i>ETV5</i>    | AGCACAAGTTCCTGATGATG   | CATAGTTAGCACCAAGAGCC   |
| <i>SOX2</i>    | CACATGAACGGCTGGAG      | CTGGTCATGGAGTTGTACTG   |
| <i>NANOG</i>   | AACTCTCCAACATCCTGAAC   | GTAGGAAGAGTAAAGGCTGG   |
| <i>POU5F1</i>  | GGGAAGGTATTCAGCCAAAC   | AGAACCACACTCGGACC      |
| <i>KLF4</i>    | CACACGGGATGATGCTC      | GTCACAGTGGTAAGGTTTCT   |
| <i>ALDH1A1</i> | TGTTAGCTGATGCCGACTTG   | TTCTTAGCCCGCTCAACACT   |
| <i>ALDH1A2</i> | CCATTGGAGTGTGTGGACAG   | GATGAGGGCTCCCATGTAGA   |
| <i>ALDH1A3</i> | TCTCGACAAAGCCCTGAAGT   | GTCCGATGTTTGAGGAAGGA   |

**Table S2.** Main elements of MEK1/2-ERK1/2 signaling pathway.

| Protein name | UniProt ID | Gene name     | NCBI Gene ID | Function                                                                                              | References  |
|--------------|------------|---------------|--------------|-------------------------------------------------------------------------------------------------------|-------------|
| GRB2         | P62993     | <i>GRB2</i>   | 2885         | Adaptor protein linking membrane receptors and RAS-controlled signaling pathways                      | [85-88]     |
| SOS1         | Q07889     | <i>SOS1</i>   | 6654         | Promoter of GDP-GTP exchange in RAS proteins                                                          | [89]        |
| KRas         | P01116     | <i>KRAS</i>   | 3845         | Family of membrane-bound GTPases mediating signal transduction from GRB2 to RAF proteins              | [90-93]     |
| HRas         | P01112     | <i>HRAS</i>   | 3265         |                                                                                                       |             |
| NRas         | P01111     | <i>NRAS</i>   | 4893         |                                                                                                       |             |
| BRAF         | P15056     | <i>BRAF</i>   | 673          | Family of protein kinases activated by Ras proteins and targeting MEK1/2                              | [91,94-98]  |
| RAF1         | P04049     | <i>RAF1</i>   | 5894         |                                                                                                       |             |
| MEK1         | Q01986     | <i>MAP2K1</i> | 5604         | Protein kinases, central elements of MAP kinase signaling cascade targeting ERK1/2                    | [94,99,100] |
| MEK2         | P36507     | <i>MAP2K2</i> | 5605         |                                                                                                       |             |
| ERK1         | P27361     | <i>MAPK3</i>  | 5595         | Protein kinases, main effectors of MAP kinase signaling cascade, phosphorylate more than 100 proteins | [94,99,101] |
| ERK2         | P28482     | <i>MAPK1</i>  | 5594         |                                                                                                       |             |

**Table S3.** MEK-responsive gene signature [52].

| Gene name     | NCBI Gene ID | Function                                                                                                                    | References |
|---------------|--------------|-----------------------------------------------------------------------------------------------------------------------------|------------|
| <i>PHLDA1</i> | 22822        | Apoptosis regulator, may exert both pro- and anti-apoptotic effects in different tumors                                     | [102,103]  |
| <i>SPRY2</i>  | 10253        | Proliferation suppressor, negative feedback regulator of MEK-ERK activity, promotes glioblastoma growth and chemoresistance | [104-106]  |
| <i>SPRY4</i>  | 81848        | Proliferation suppressor, negative feedback regulator of MEK-ERK activity                                                   | [107,108]  |
| <i>DUSP4</i>  | 1846         | Proliferation and invasion suppressor, ERK phosphorylation inhibitor                                                        | [109,110]  |
| <i>DUSP6</i>  | 1848         | Proliferation suppressor, metastases formation suppressor, ERK phosphorylation inhibitor                                    | [111,112]  |
| <i>CCND1</i>  | 595          | Proliferation stimulator, proto-oncogene                                                                                    | [113,114]  |
| <i>EPHA2</i>  | 1969         | Proliferation, EMT and invasion stimulator, apoptosis stimulator in some systems                                            | [115-117]  |
| <i>EPHA4</i>  | 2043         | Invasion stimulator, marker of poor prognosis                                                                               | [118,119]  |
| <i>ETV4</i>   | 2118         | Proliferation and invasion stimulator, sustains cell stemness                                                               | [120-122]  |
| <i>ETV5</i>   | 2119         | Proliferation stimulator, invasion suppressor, sustains cell stemness                                                       | [122-124]  |

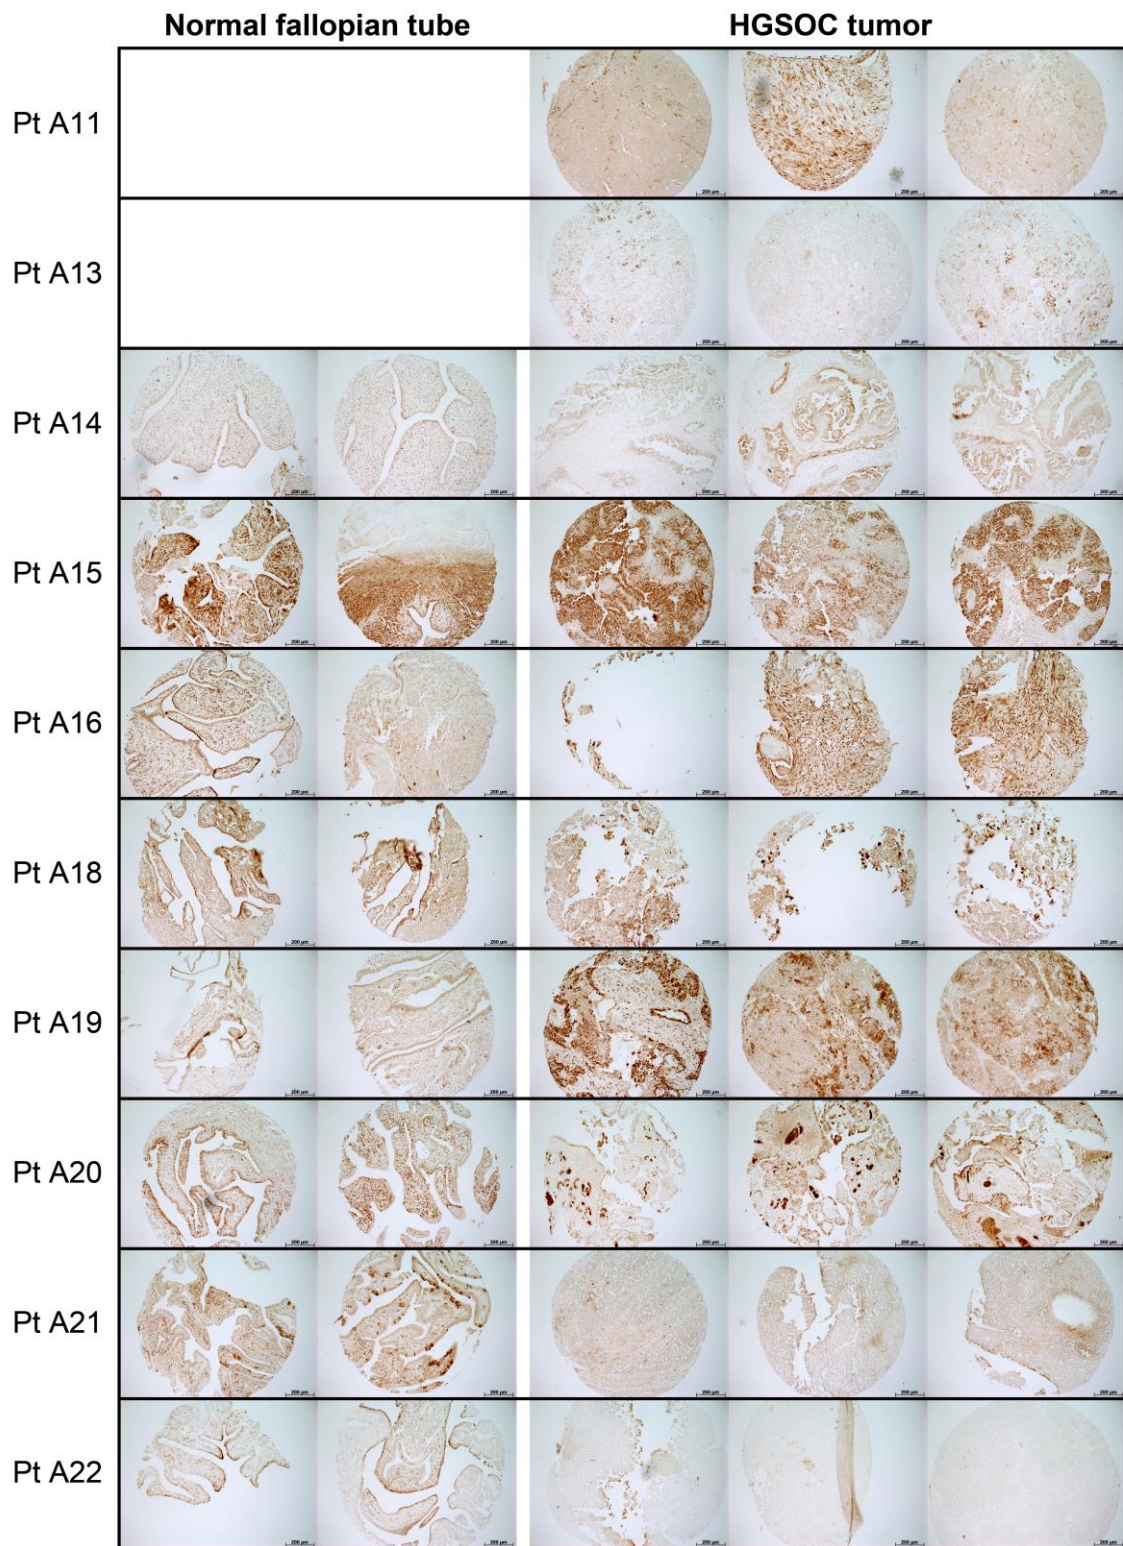

**Figure S1.** Immunohistochemical staining of phosphorylated ERK1/2 in all available clinical samples of HGSOC and normal fallopian tube tissues. Scale bars: 200  $\mu$ m. Pt XXX – patient number XXX as provided by Lifespan Research Laboratories.

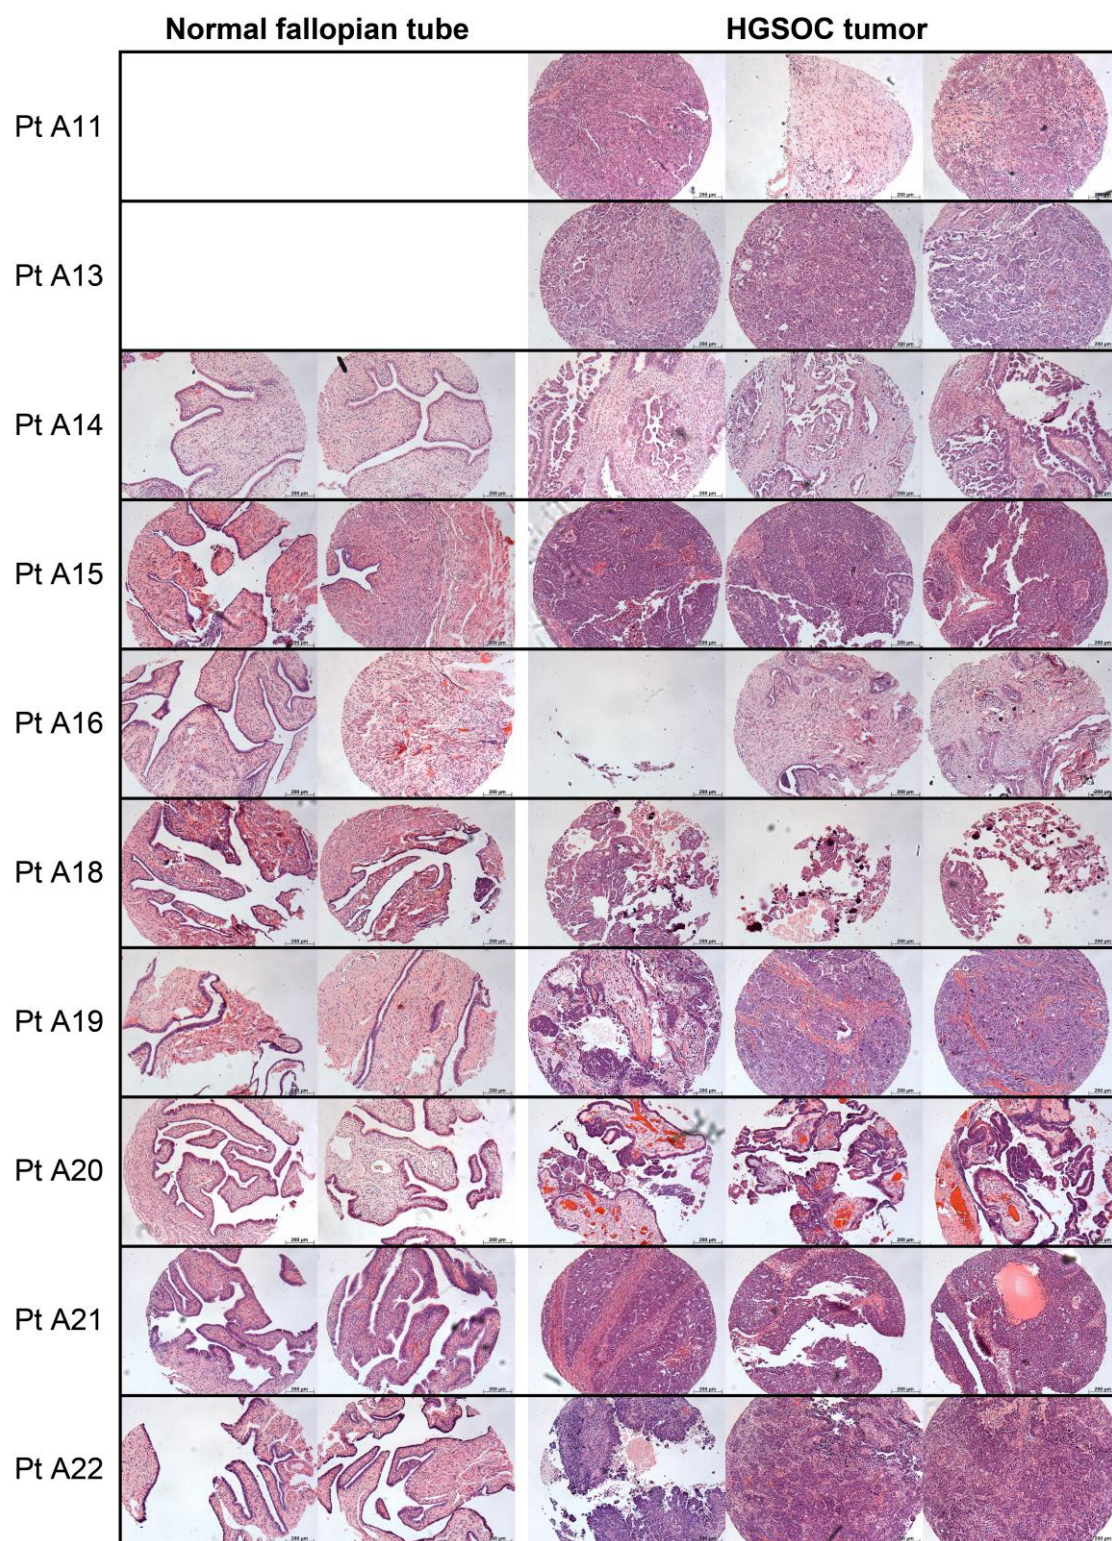

**Figure S2.** Hematoxylin and eosin staining of all available clinical samples of HGSOC and normal fallopian tube tissues. Scale bars: 200  $\mu$ m. Pt XXX – patient number XXX as provided by Lifespan Research Laboratories.

## Pt A19

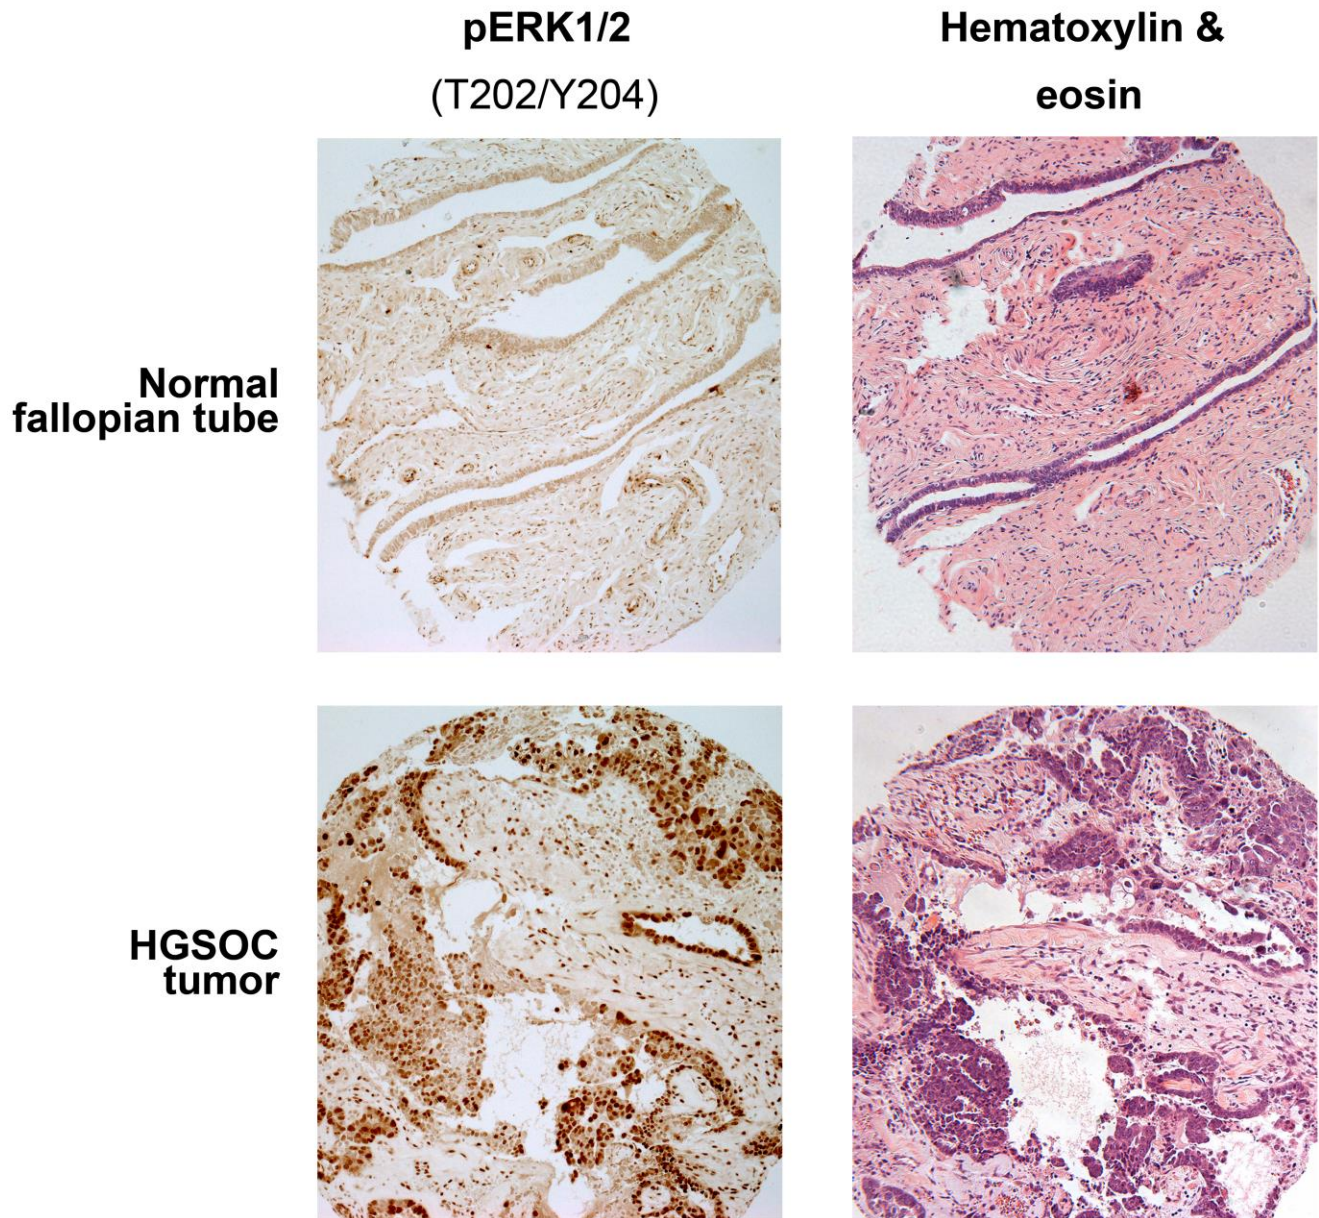

**Figure S3.** High-resolution images of phosphorylated ERK1/2 and hematoxylin and eosin staining for patient A19 clinical samples of HGSOC and normal fallopian tube tissues. Scale bars: 200  $\mu$ m. Pt A19 - patient number A19 as provided by Lifespan Research Laboratories, pERK1/2 – phosphorylated ERK1/2.

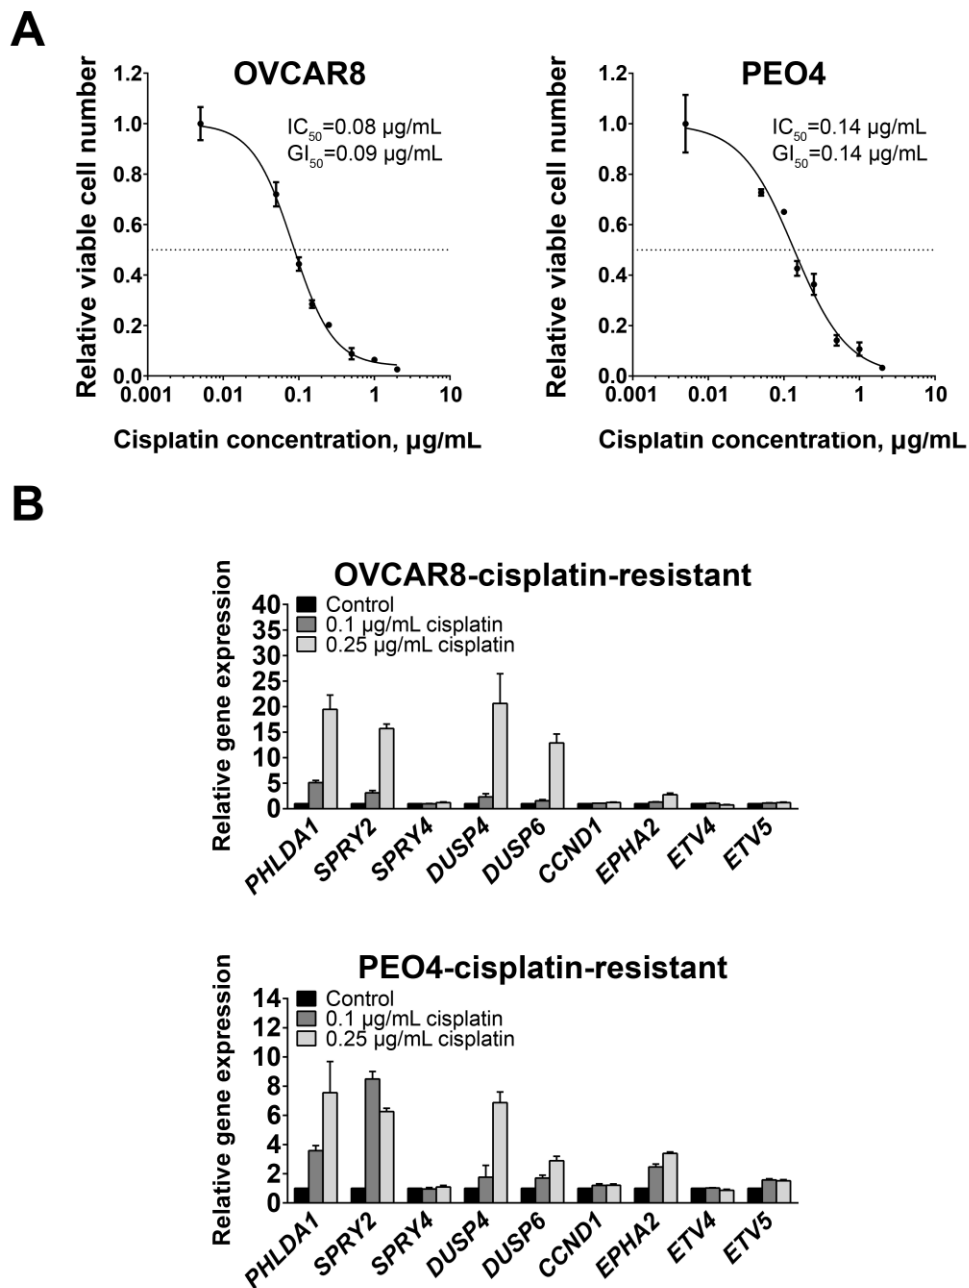

**Figure S4. Response of HGSOc cell lines OVCAR8 and PEO4 to transient or prolonged cisplatin treatment. (A)** Dose-response curves generated using relative viable cell numbers after treatment with various concentrations of cisplatin for 72 hours. Data are normalized to vehicle-treated control samples (not shown) and presented as mean $\pm$ S.D. (N=3). **(B)** Gene expression levels of MEK1/2-responsive genes in cells resistant to the indicated concentrations of cisplatin. Data are normalized to “Control” samples and presented as mean $\pm$ S.E.M. (N=3, technical replicates).

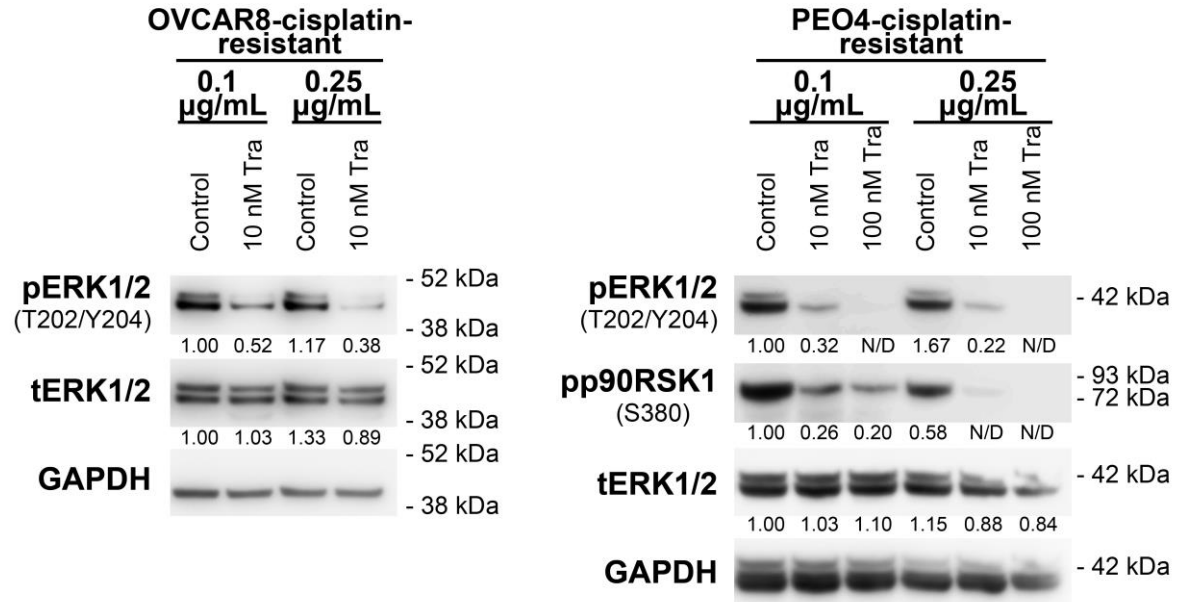

**Figure S5. MEK1/2-ERK1/2 pathway activity changes in cisplatin-resistant HGSOC cell cultures.** Immunoblotting analysis of phosphorylated and total ERK1/2 protein levels in cisplatin-resistant cells treated with trametinib for 24 hours. Numbers under the bands represent relative intensity normalized to GAPDH levels and “0.1 µg/mL-Control” samples. Tra – trametinib, pERK1/2 – phosphorylated ERK1/2, pp90RSK1 – phosphorylated p90RSK1, tERK1/2 – total ERK1/2, N/D – non-detectable signal.

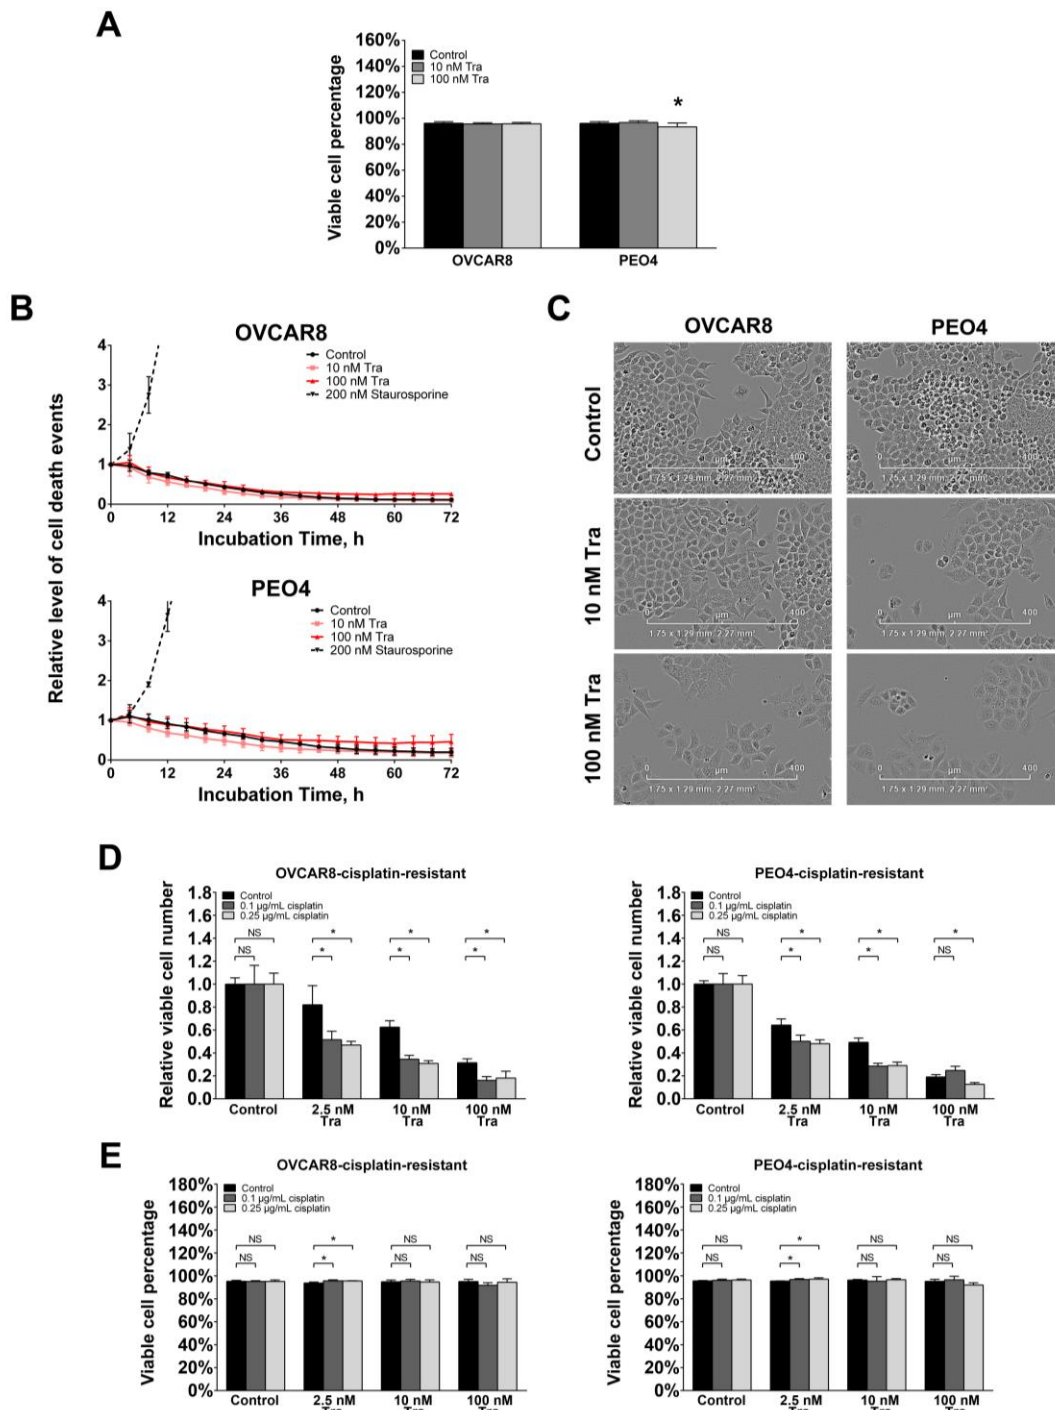

**Figure S6. Changes in functional characteristics of HGSOC cell cultures caused by trametinib treatment.** (A) Viable cell percentages after treatment with trametinib for 72 hours. Data are presented as mean+S.D. (N=6, Mann-Whitney U-test). (B) Cytotoxic effect of trametinib treatment detected using the CytoTox reagent. Staurosporin is used as a positive control. Fluorescence level for each time point is normalized to the area covered by cells and starting value; data are presented as mean±S.D. (N=4, Mann-Whitney U-test). (C) Cell morphology and confluence after treatment with trametinib for 72 hours. Scale bars: 400 μm. (D) Viable cell numbers of cisplatin-resistant cells after treatment with trametinib for 72 hours. Data are normalized to “Control” samples for each cell culture and presented as mean+S.D. (N=4, Mann-Whitney U-test). (E) Viable cell percentages of cisplatin-resistant cells after treatment with trametinib for 72 hours. Data are presented as mean+S.D. (N=4, Mann-Whitney U-test). Tra – trametinib, NS – non-significant difference.

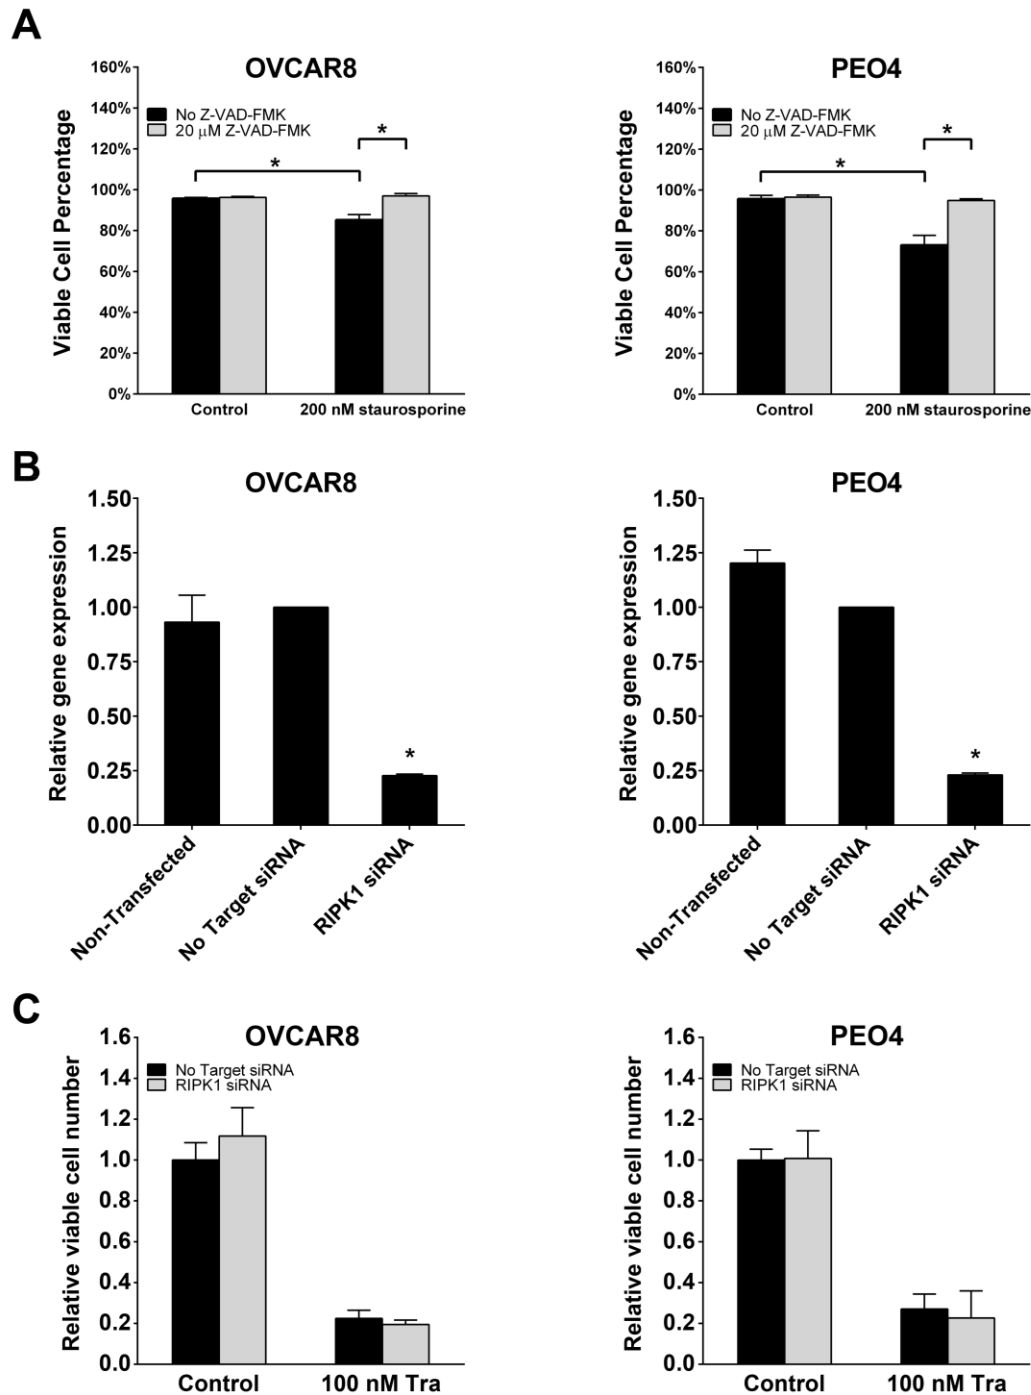

**Figure S7. Effect of cell death-related treatment of HGSOc cells.** (A) Viable cell percentages of cells treated with pan-caspase inhibitor Z-VAD-FMK and staurosporine for 24 hours. Data are normalized to “Control, No Z-VAD-FMK” sample and presented as mean+S.D. (N=3, one-tailed Mann-Whitney U-test, \* –  $p = 0.05$ ). (B) Gene expression levels of *RIPK1* gene in cells transfected with anti-*RIPK1* siRNA. Data are normalized to “No Target siRNA” samples and presented as mean+S.D. (N=3, two-tailed Student’s T-test with Welch’s correction). (C) Viable cell numbers of cells with siRNA-mediated *RIPK1* knockdown treated with trametinib for 72 hours. Data are normalized to “Control, No Target siRNA” sample and presented as mean+S.D. (N=3, no statistical analysis performed due to insufficient number of replicate and clear lack of differences). Tra – trametinib, siRNA – short interfering RNA.

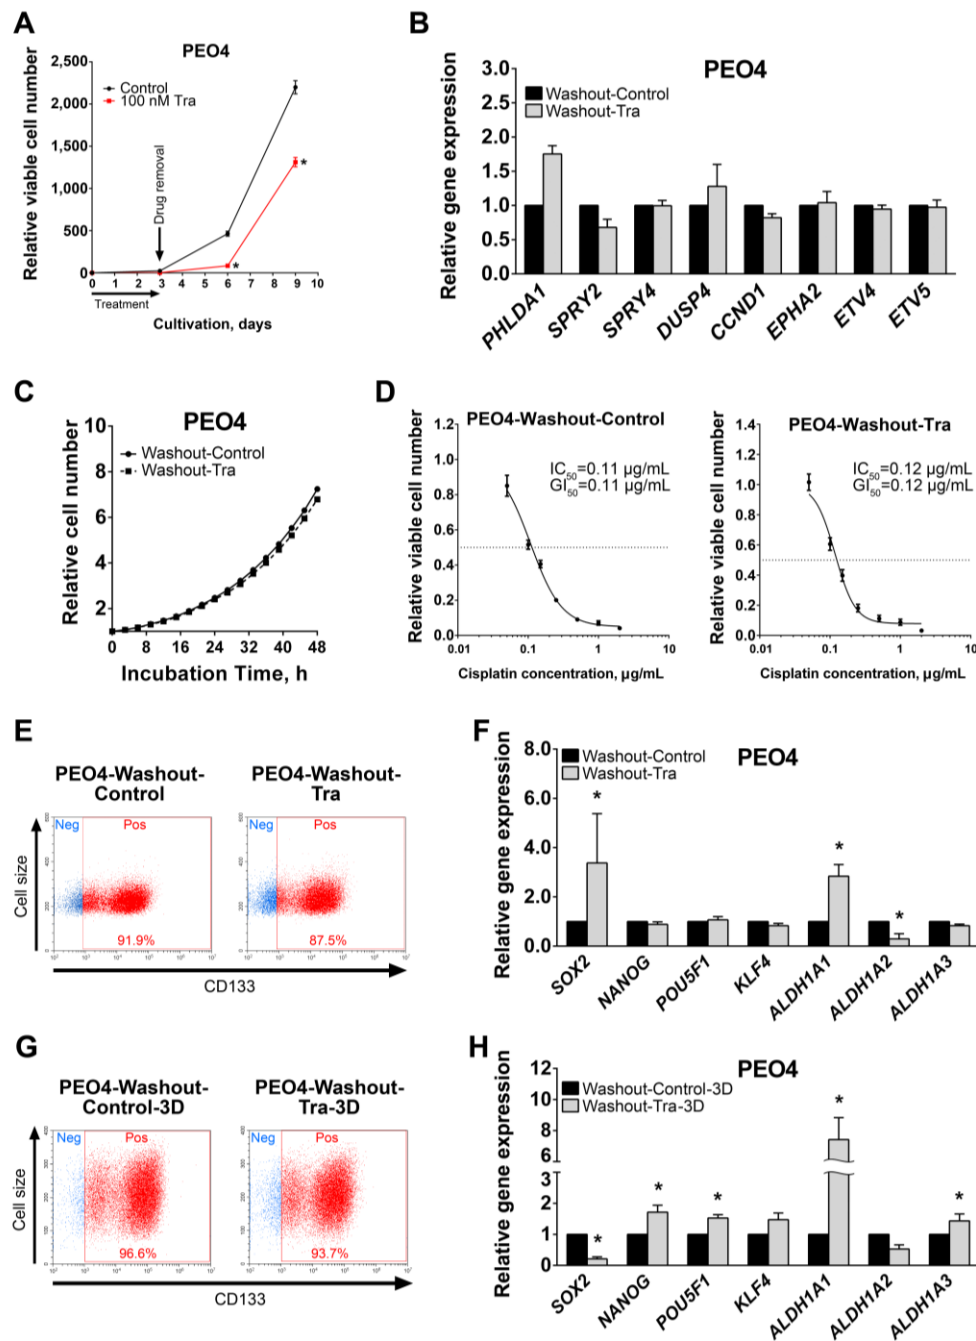

**Figure S8. Effects of trametinib washout upon properties of PEO4 cells.** (A) Cell growth kinetics during the initial establishment of PEO4-Washout cells. Data are normalized to starting cell number and presented as mean±S.D. (N=6, Mann-Whitney U-test). (B) Gene expression levels of MEK1/2-responsive genes. Data are normalized to “Washout-Control” samples and presented as mean+S.E.M. (N=3, technical replicates). (C) Growth kinetics of cells in standard conditions. Data are normalized to starting cell number and presented as mean±S.D. (N=4, Mann-Whitney U-test). (D) Dose-response curves generated using relative viable numbers of cells after treatment with various concentrations of cisplatin for 72 hours. Data are normalized to vehicle-treated control samples (not shown) and presented as mean±S.D. (N=3). (E) Expression of the CD133 surface marker in cells grown in standard conditions. Gates indicate CD133-negative (“Neg”) and CD133-positive (“Pos”) cell subpopulations. (F) Gene expression levels of stemness-related genes. Data are normalized to “Washout-Control” samples and presented as mean+S.D. (N=3, two-tailed Student’s T-test with Welch’s correction). (G) Expression of the CD133 surface marker in cells grown in non-adherent conditions. Gates indicate CD133-negative (“Neg”) and CD133-positive (“Pos”) cell subpopulations. (H) Gene expression levels of stemness-related genes in cells grown in non-adherent conditions. Data are normalized to “Washout-Control” samples and presented as mean+S.D. (N=3, two-tailed Student’s T-test with Welch’s correction). Tra – trametinib.

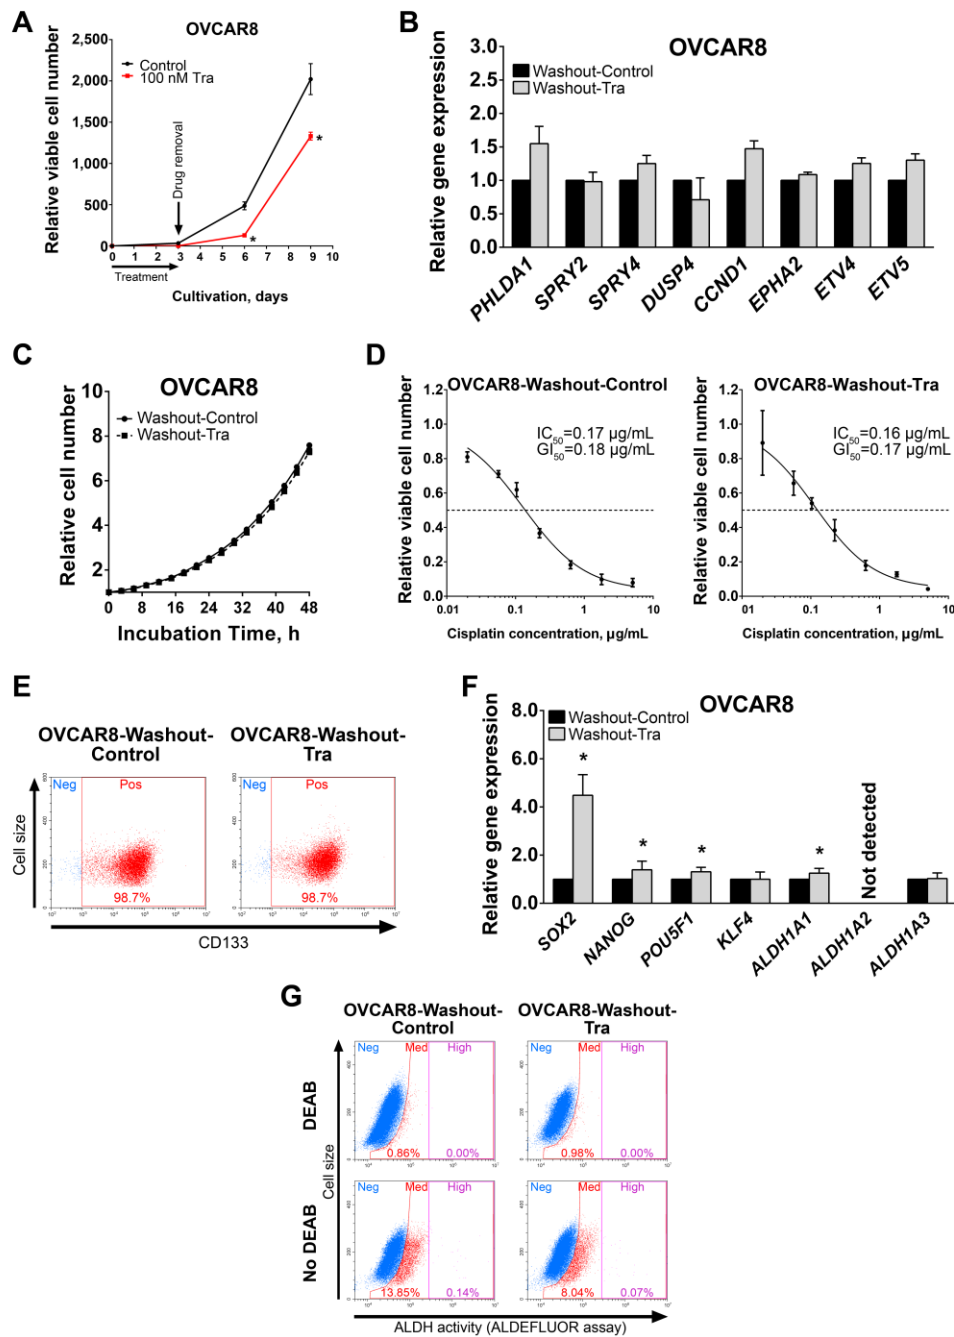

**Figure S9. Effects of trametinib washout upon properties of OVCAR8 cells.** (A) Cell growth kinetics during the initial establishment of OVCAR8-Washout cells. Data are normalized to starting cell number and presented as mean±S.D. (N=6, Mann-Whitney U-test). (B) Gene expression levels of MEK1/2-responsive genes. Data are normalized to “Washout-Control” samples and presented as mean±S.E.M. (N=3, technical replicates). (C) Growth kinetics of cells in standard conditions. Data are normalized to starting cell number and presented as mean±S.D. (N=4, Mann-Whitney U-test). (D) Dose-response curves generated using relative viable numbers of cells after treatment with various concentrations of cisplatin for 72 hours. Data are normalized to vehicle-treated control samples (not shown) and presented as mean±S.D. (N=3). (E) Expression of the CD133 surface marker in cells grown in standard conditions. Gates indicate CD133-negative (“Neg”) and CD133-positive (“Pos”) cell subpopulations. (F) Gene expression levels of stemness-related genes. Data are normalized to “Washout-Control” samples and presented as mean±S.D. (N=3, two-tailed Student’s T-test with Welch’s correction). (G) ALDEFLUOR analysis of cells after cultivation in non-adherent 3D conditions for 7 days. DEAB was used as ALDH inhibitor to define background ALDEFLUOR signal and set proper gates for ALDH-positive cells. Gates indicate cell subpopulations displaying negative (“Neg”), medium (“Med”), or high (“High”) levels of ALDH activity. Tra – trametinib.

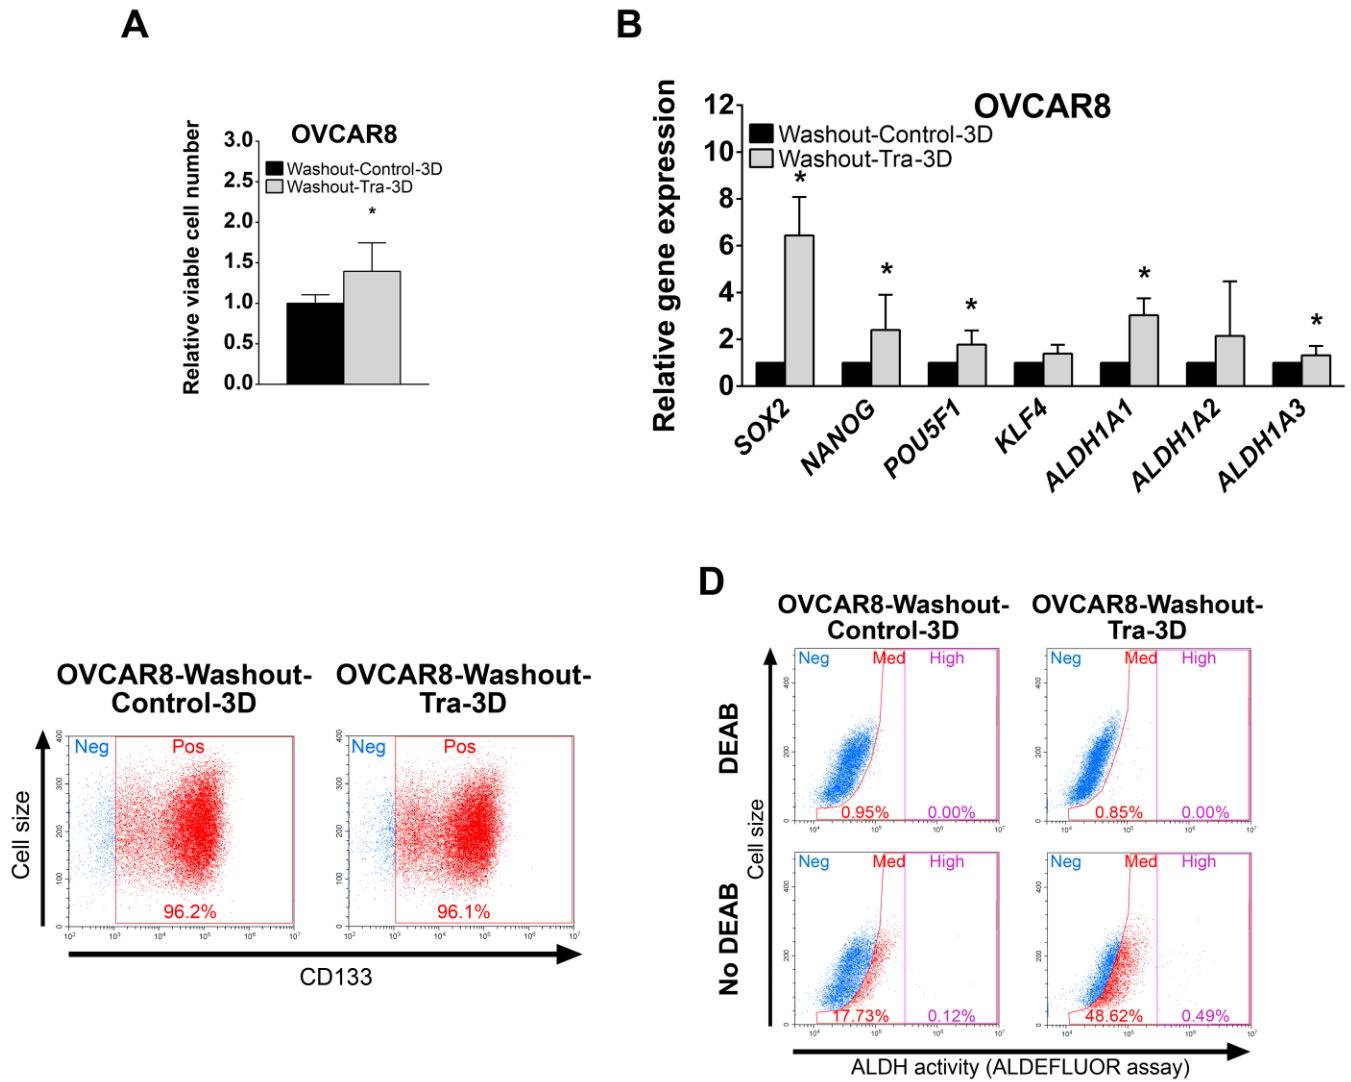

**Figure S10. Stemness-related properties of OVCAR8-Washout cells grown in non-adherent 3D conditions.** (A) Viable cell numbers after cultivation in non-adherent 3D conditions for 7 days. Data are normalized to “Washout-Control-3D” samples and presented as mean+S.D. (N=12, Mann-Whitney U-test). (B) Gene expression levels of stemness-related genes in cells grown in non-adherent conditions. Data are normalized to “Washout-Control” samples and presented as mean+S.D. (N=3, two-tailed Student’s T-test with Welch’s correction). (C) Expression of the CD133 surface marker in cells grown in non-adherent conditions. Gates indicate CD133-negative (“Neg”) and CD133-positive (“Pos”) cell subpopulations. (D) ALDEFLUOR analysis of cells after cultivation in non-adherent 3D conditions for 7 days. DEAB was used as ALDH inhibitor to define background ALDEFLUOR signal and set proper gates for ALDH-positive cells. Gates indicate cell subpopulations displaying negative (“Neg”), medium (“Med”), or high (“High”) levels of ALDH activity. Tra – trametinib.

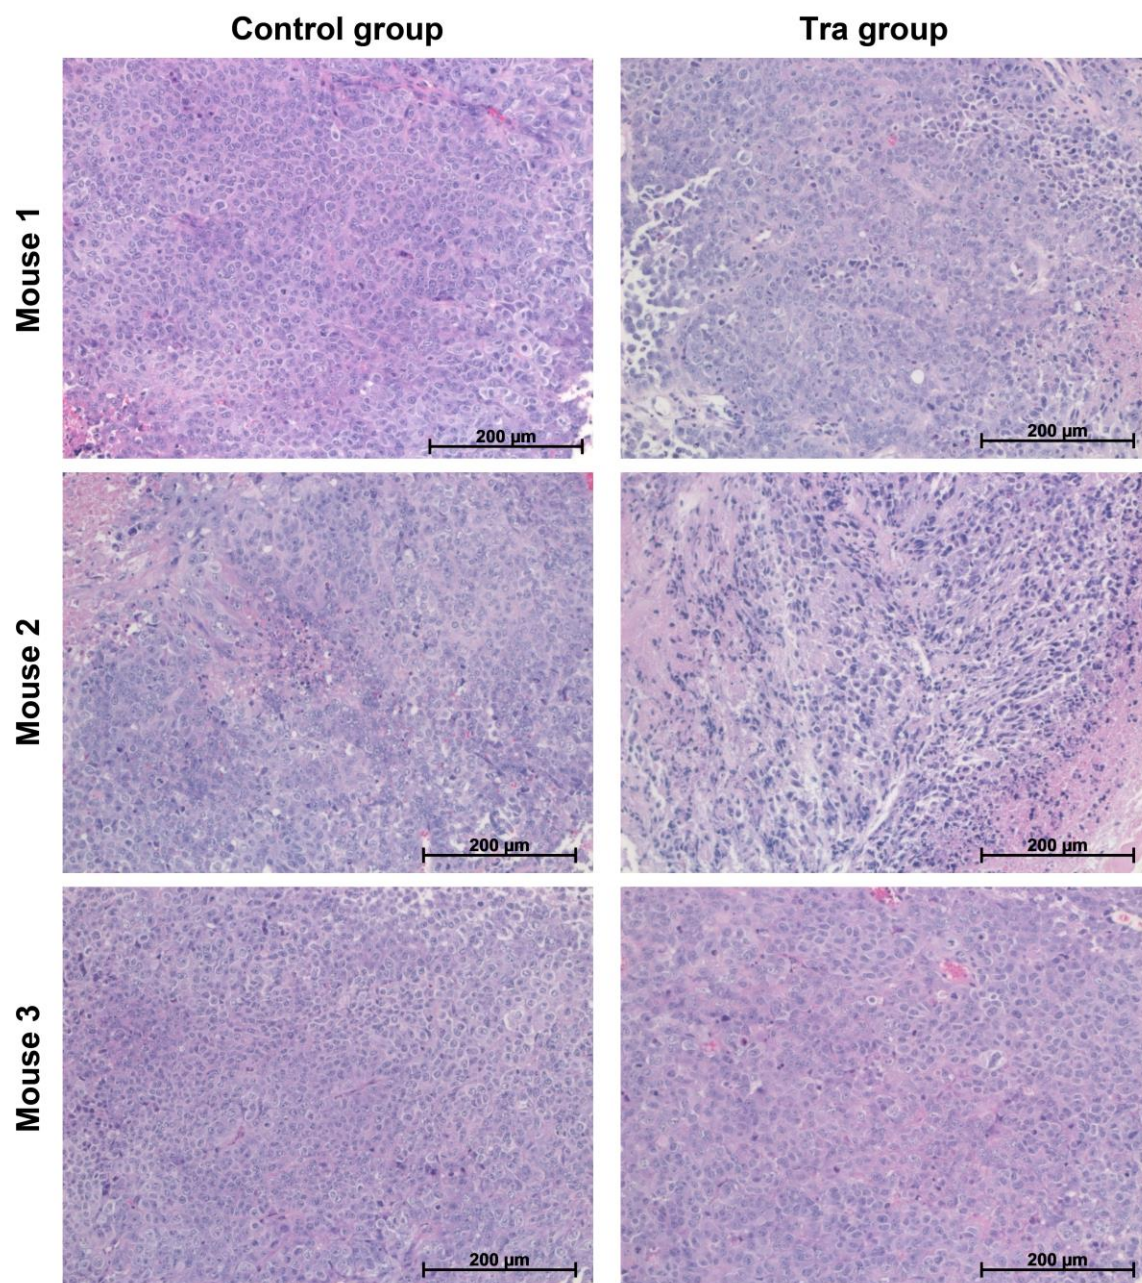

**Figure S11.** Hematoxylin and eosin staining of PEO4 xenograft tissue samples. Scale bars: 200  $\mu\text{m}$ . Tra – trametinib.

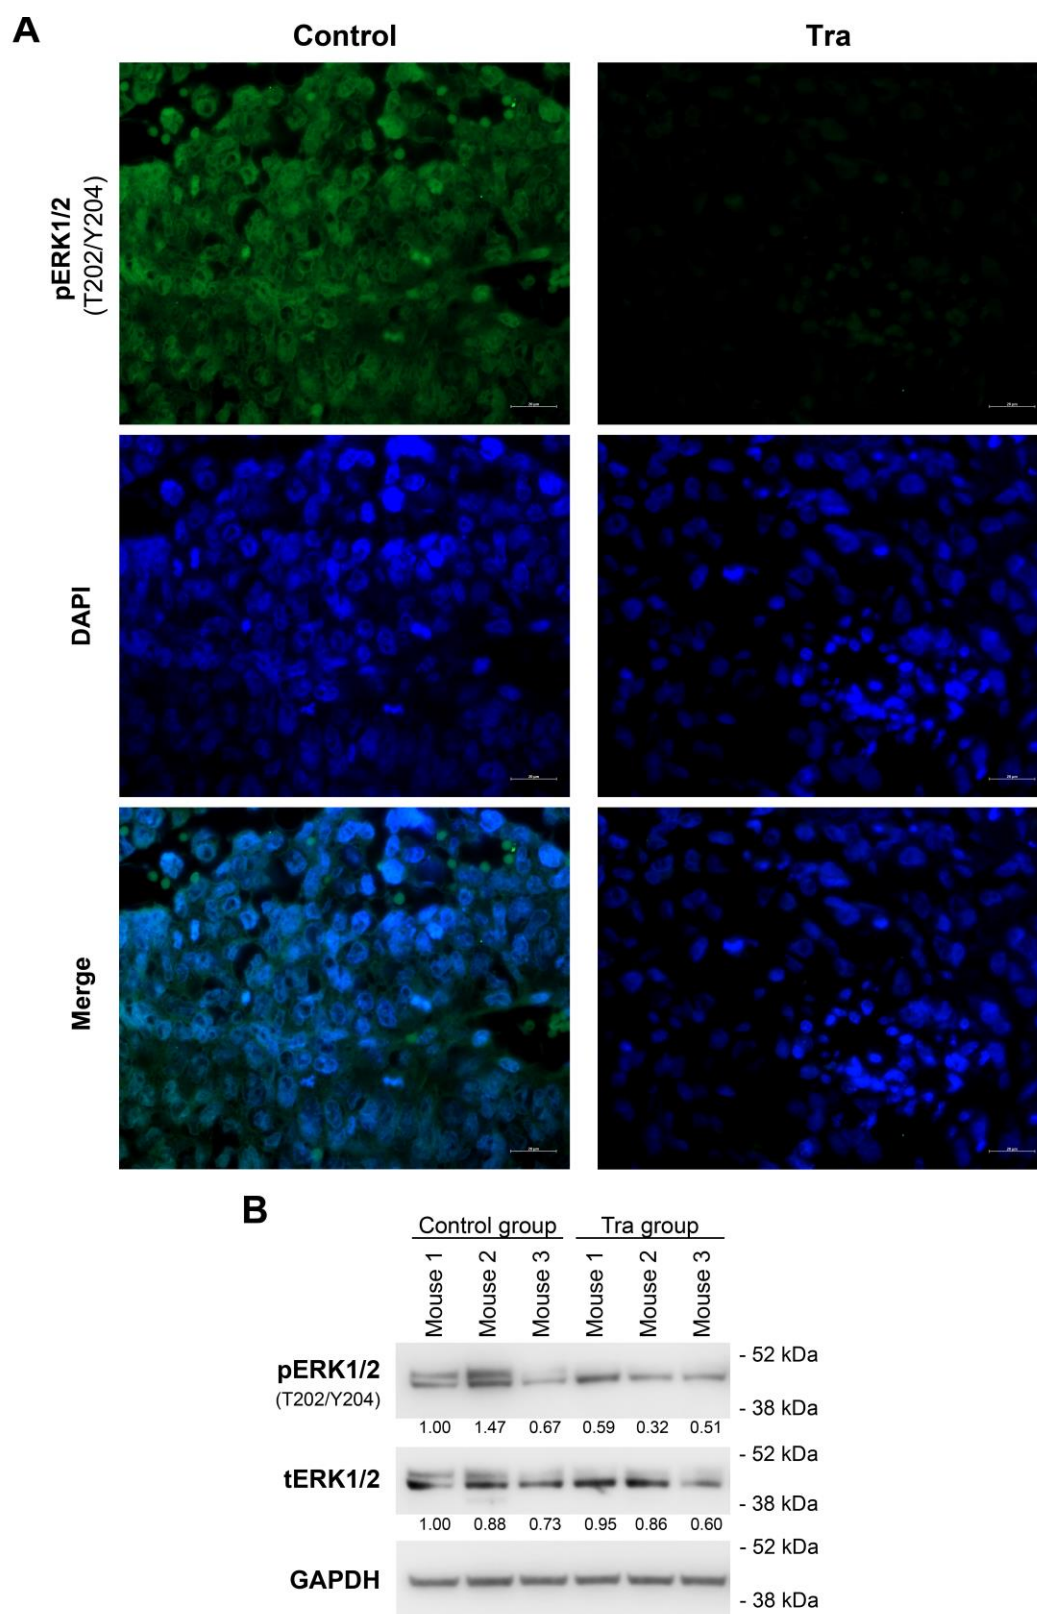

**Figure S12. Effects of trametinib treatment on MEK1/2 pathway activity in HGSOC *in vivo*.** (A) High-resolution images of immunofluorescent staining of phosphorylated ERK1/2 (green) in PEO4 xenograft tissue samples. Cell nuclei were counterstained with DAPI (blue). Scale bars: 20  $\mu$ m. (B) Immunoblotting analysis of phosphorylated ERK1/2 levels in PEO4 xenograft tissue samples. Numbers under the bands represent relative intensity normalized to GAPDH levels and Control Mouse 1 sample. Tra – trametinib.

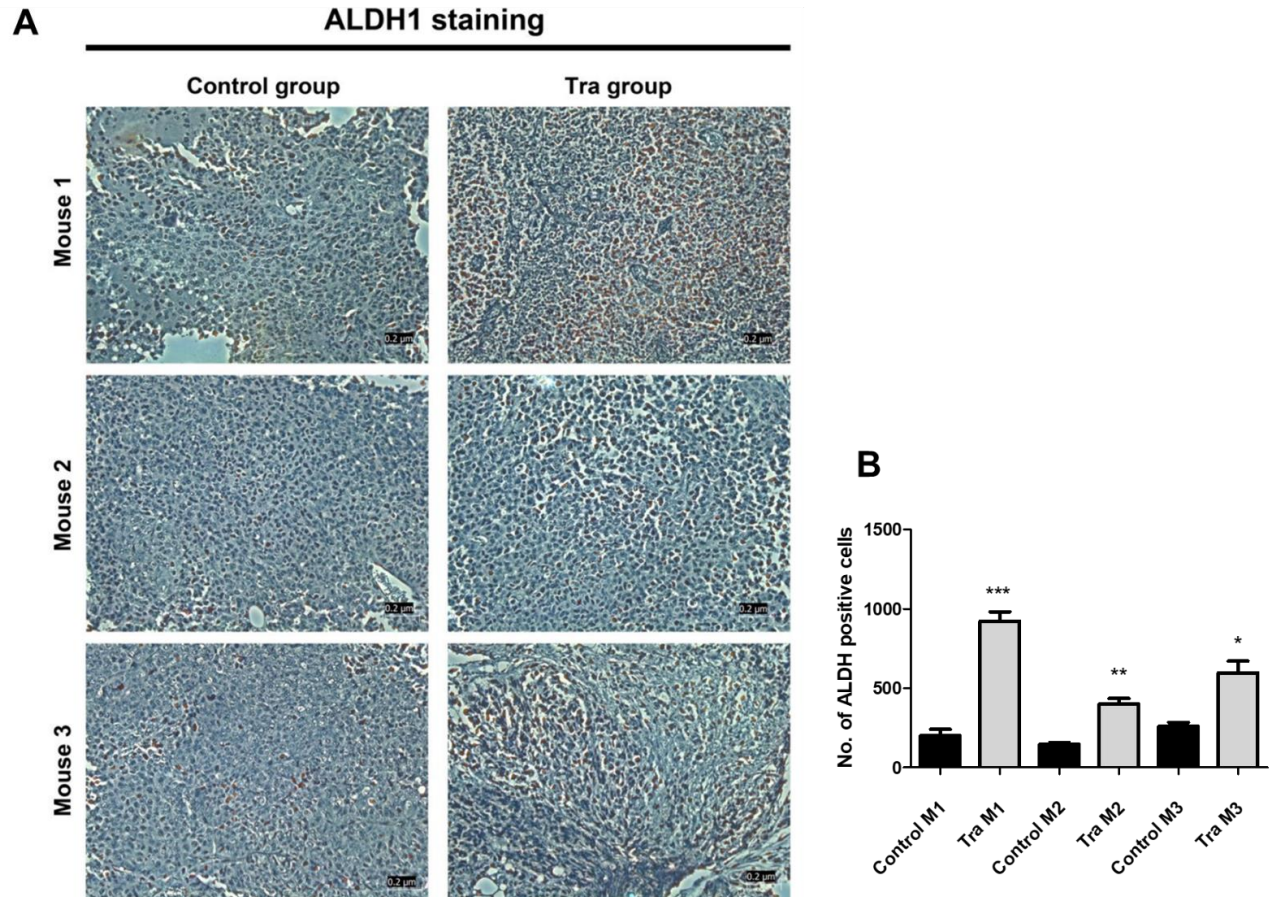

**Figure S13. Effects of trametinib treatment on ALDH1 expression in HGSOC xenografts.** A) Immunohistochemical staining of ALDH1 in PEO4 xenograft tissue samples with hematoxylin counterstaining. Scale bars: 0.2  $\mu$ m. Tra –trametinib. B) No. of ALDH positive cells quantified by image J software. (N=5, two-tailed Student's T-test with Welch's correction). Tra – trametinib.

# Uncropped Immunoblotting Images

Figure 2A.

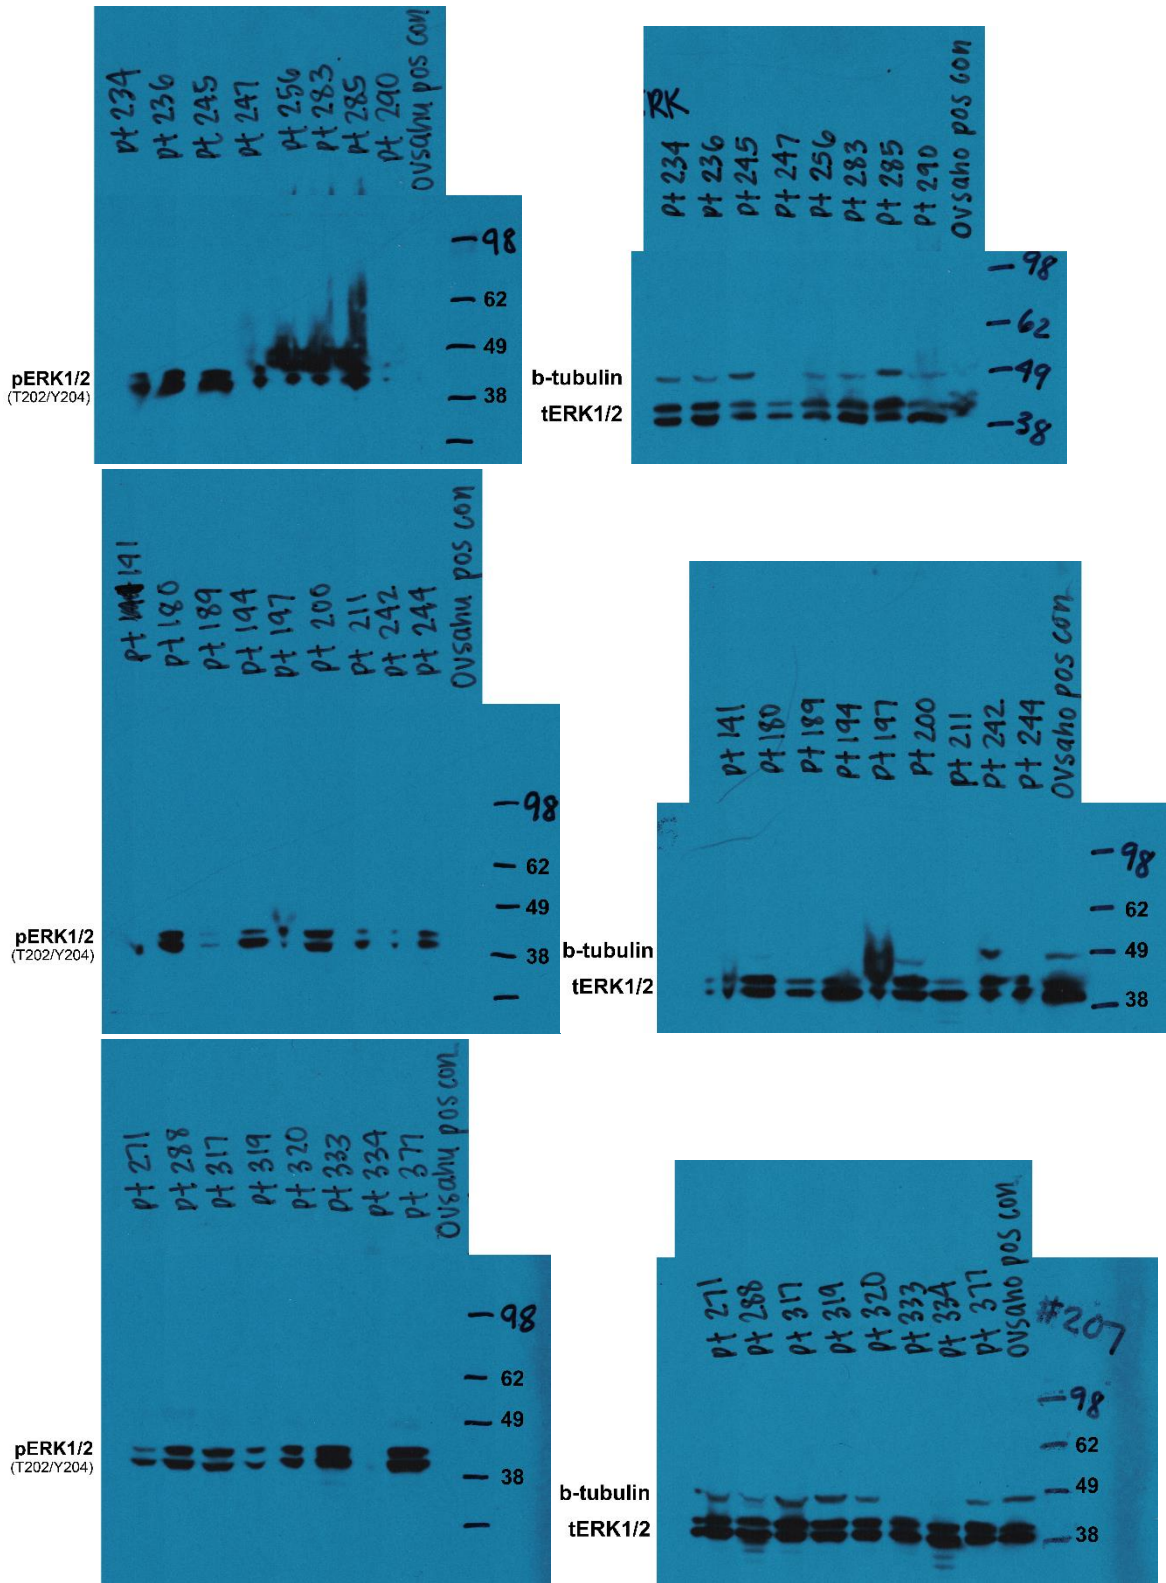

Figure 2A (Continued).

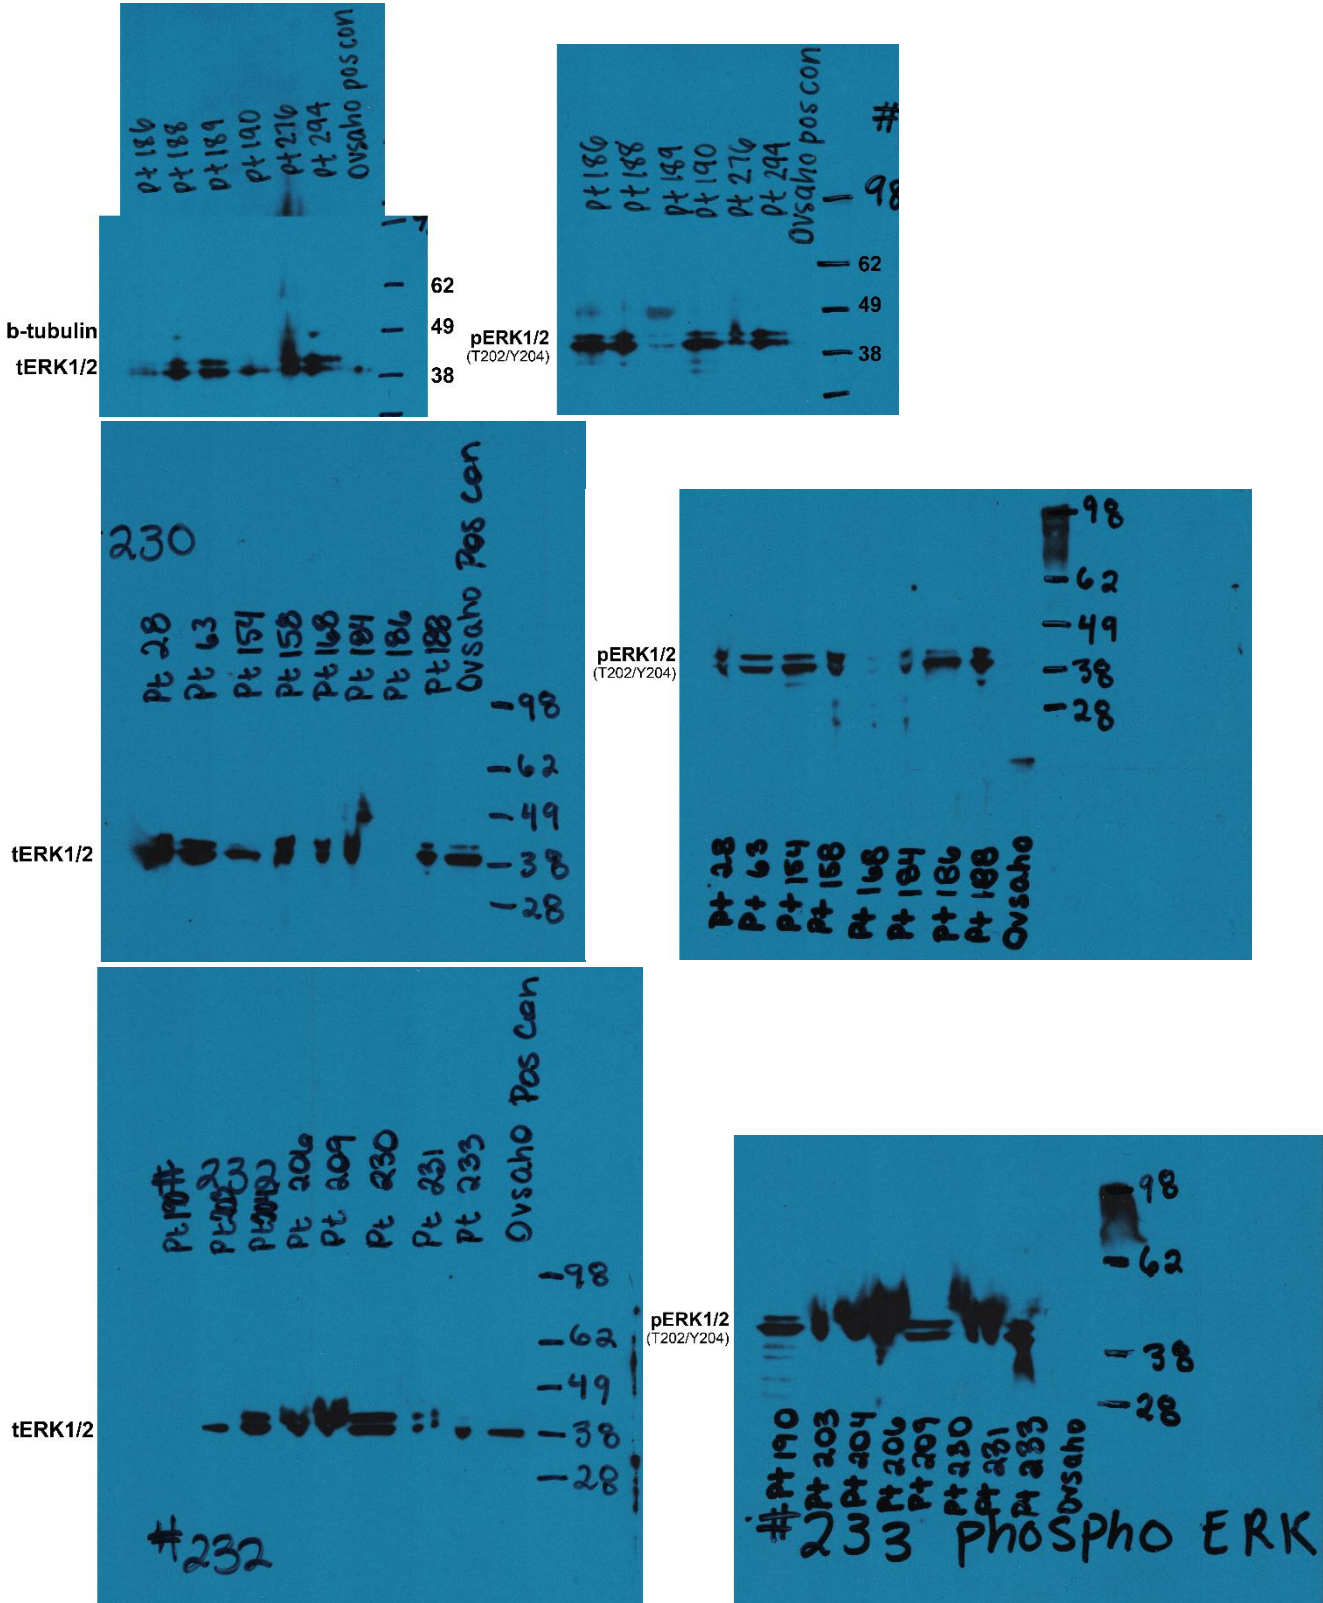

Figure 2A (Continued).

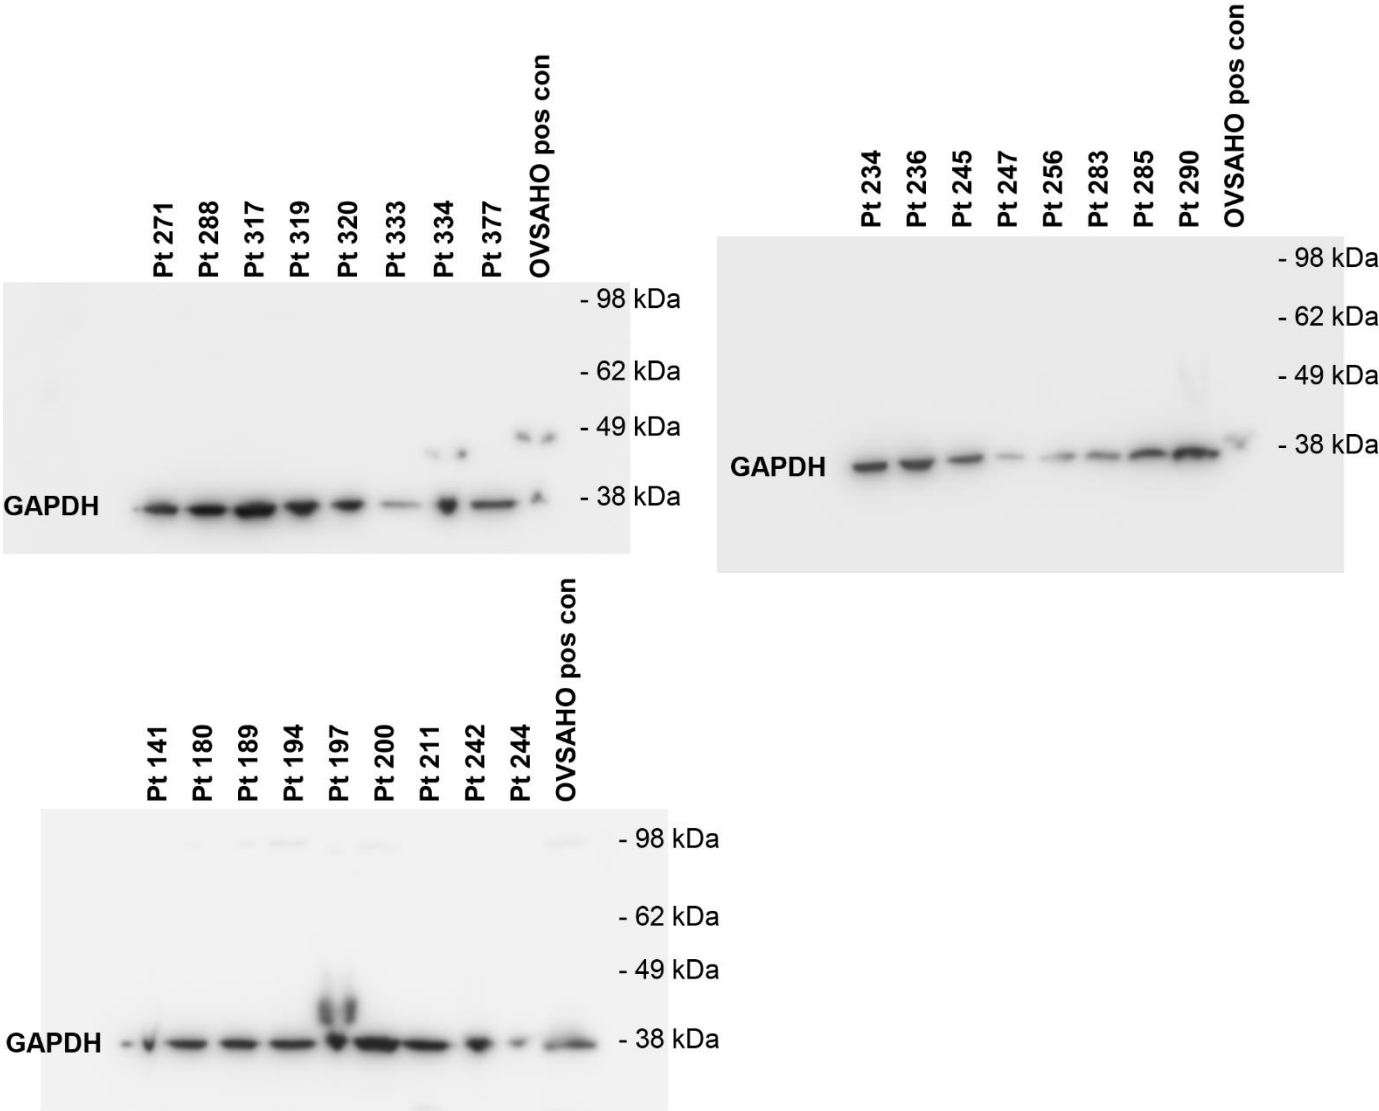

Figure 2C.

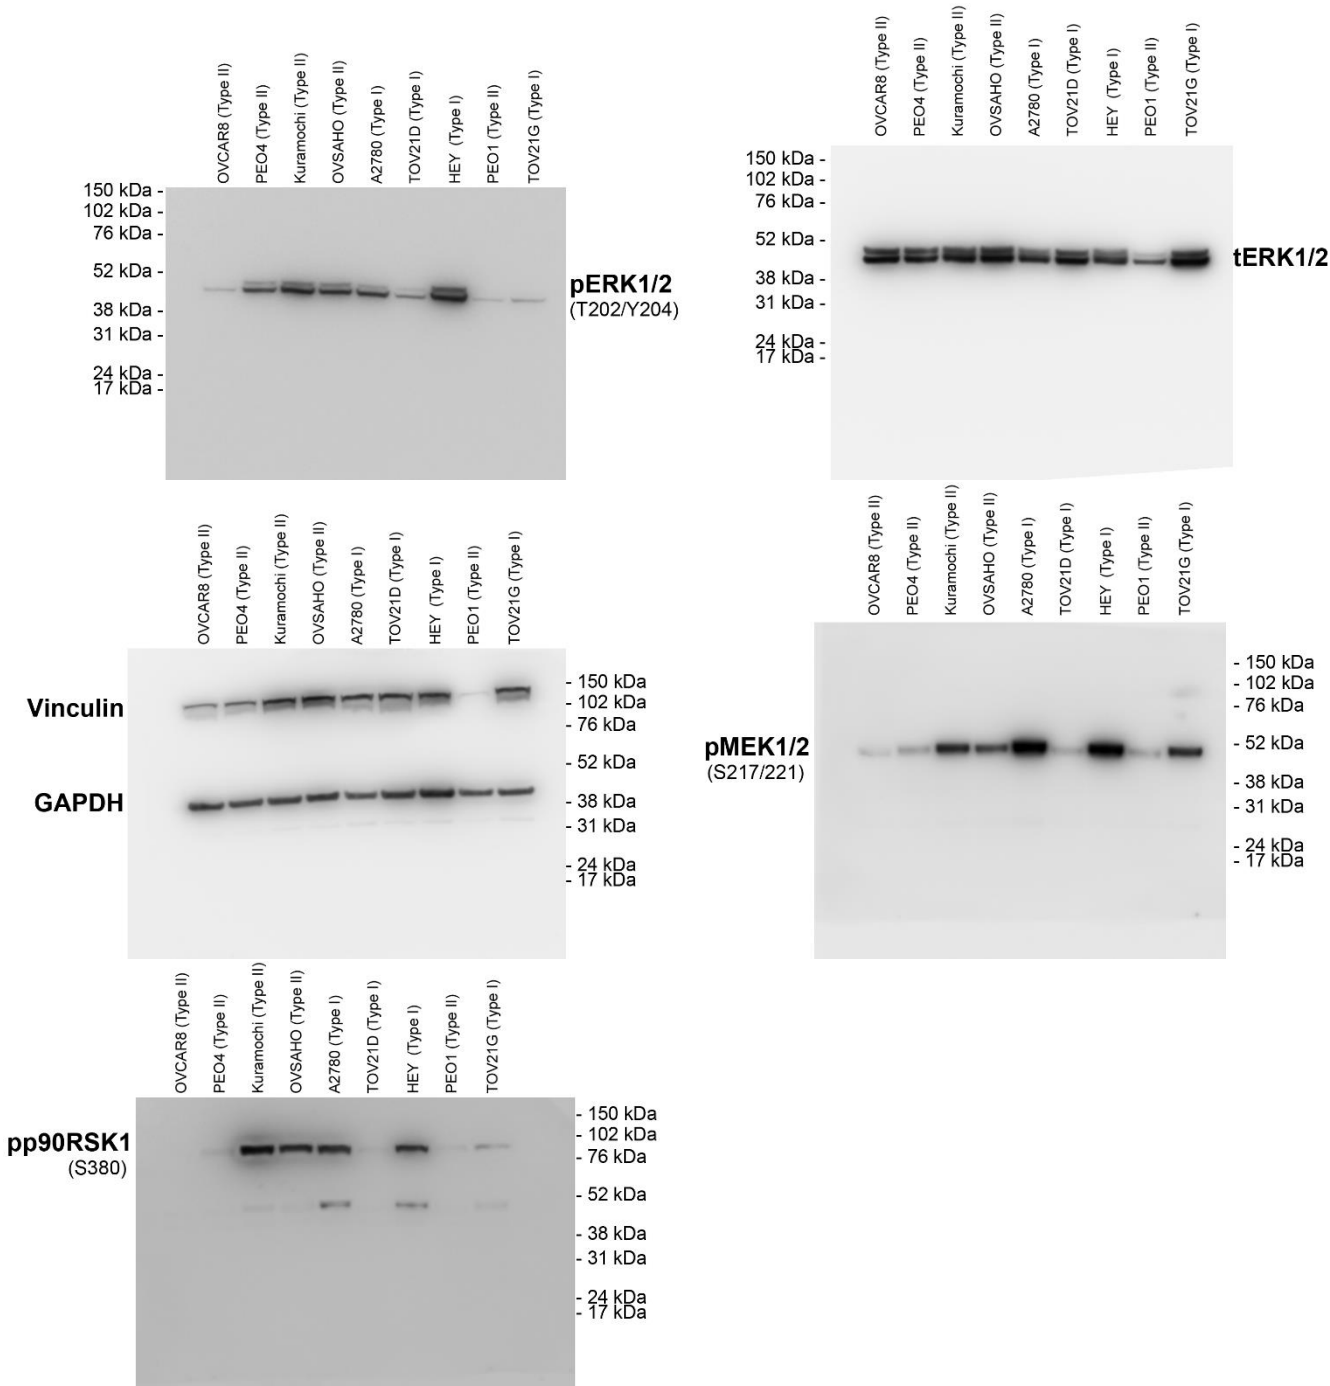

Figure 3A.

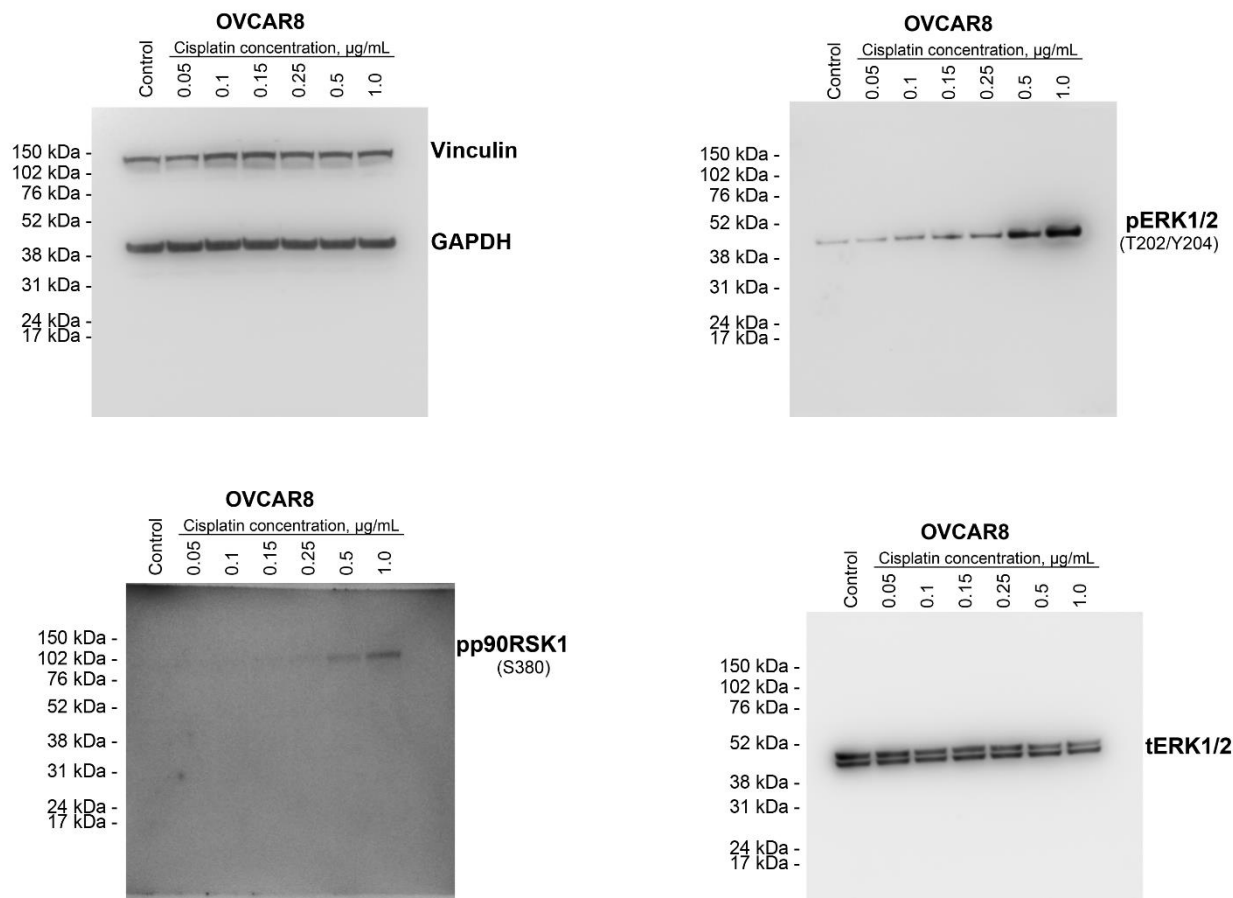

Figure 3A (Continued).

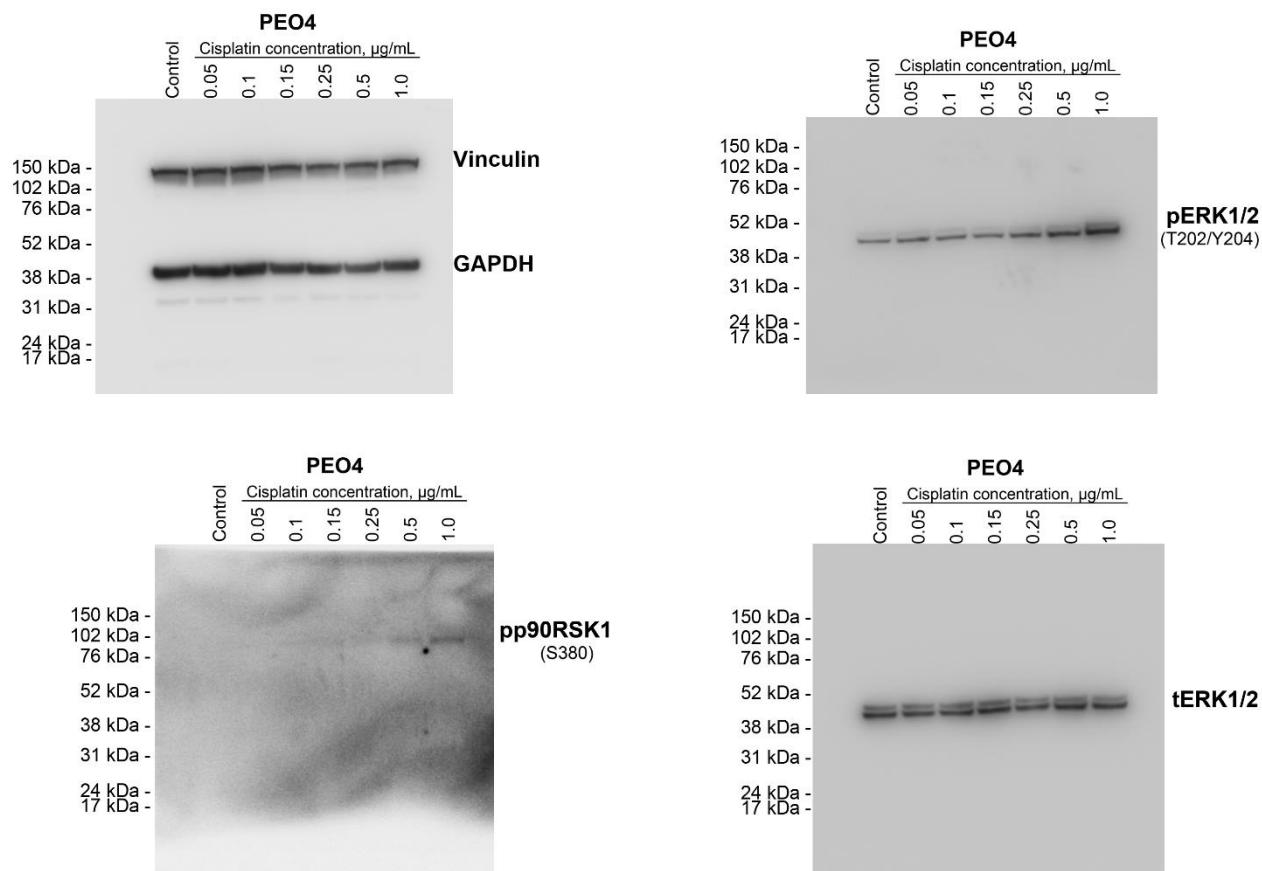

Figure 3B.

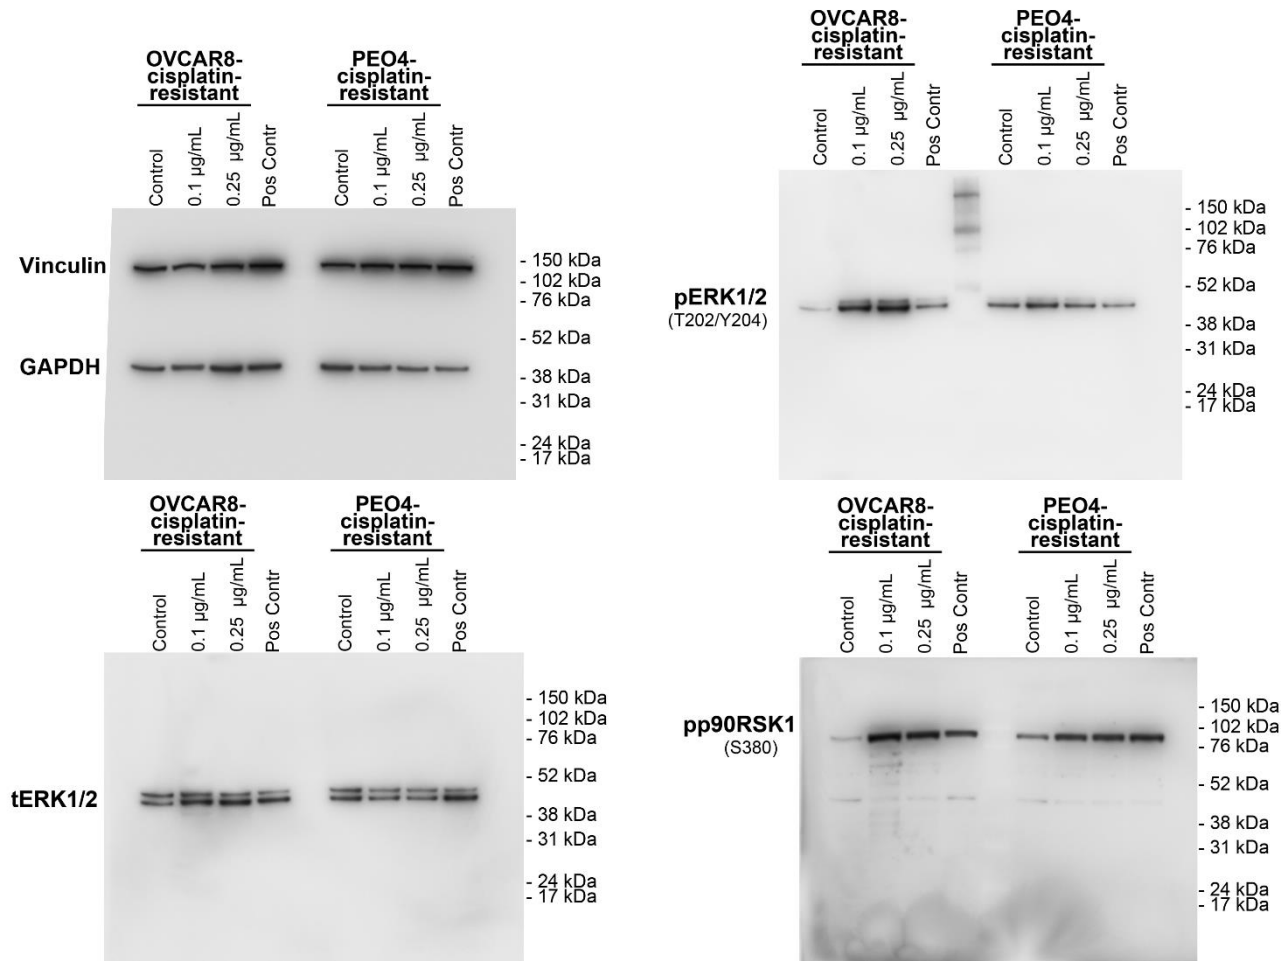

Figure 3C.

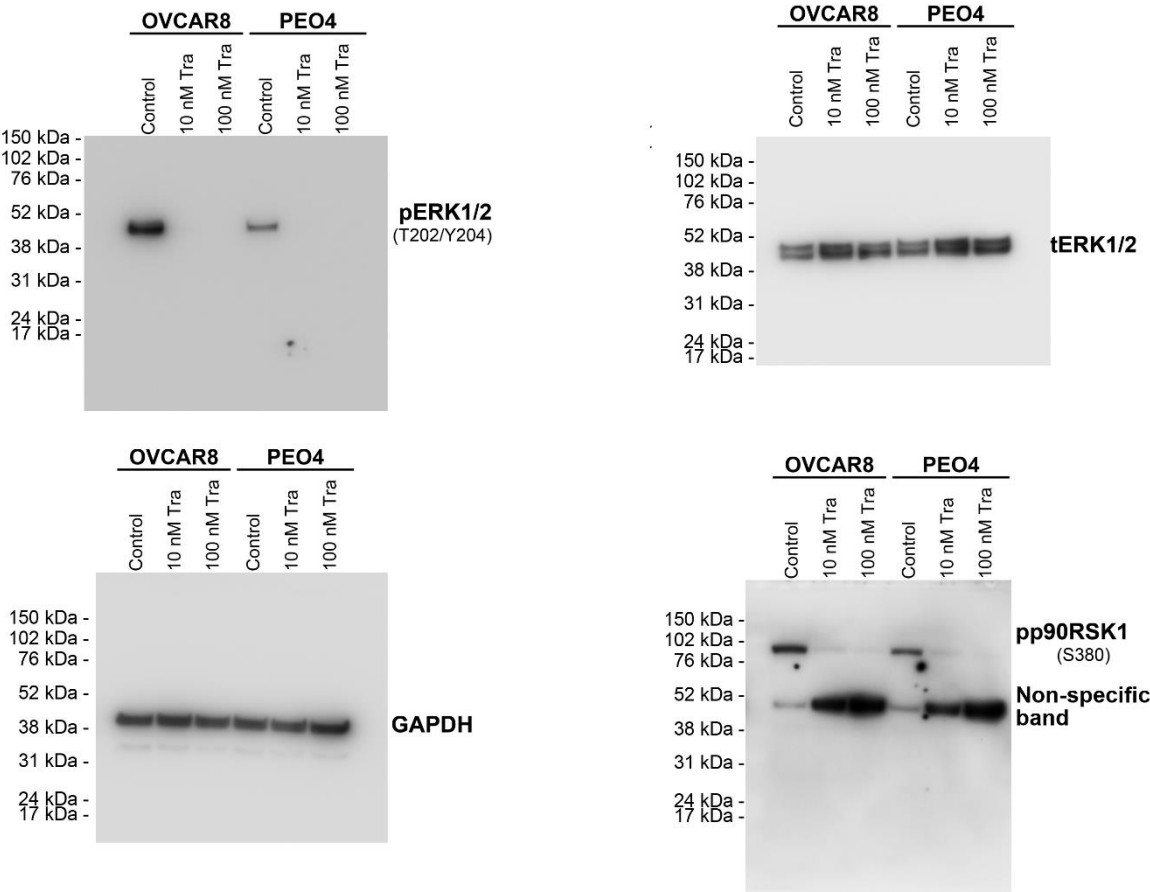

Figure 5C.

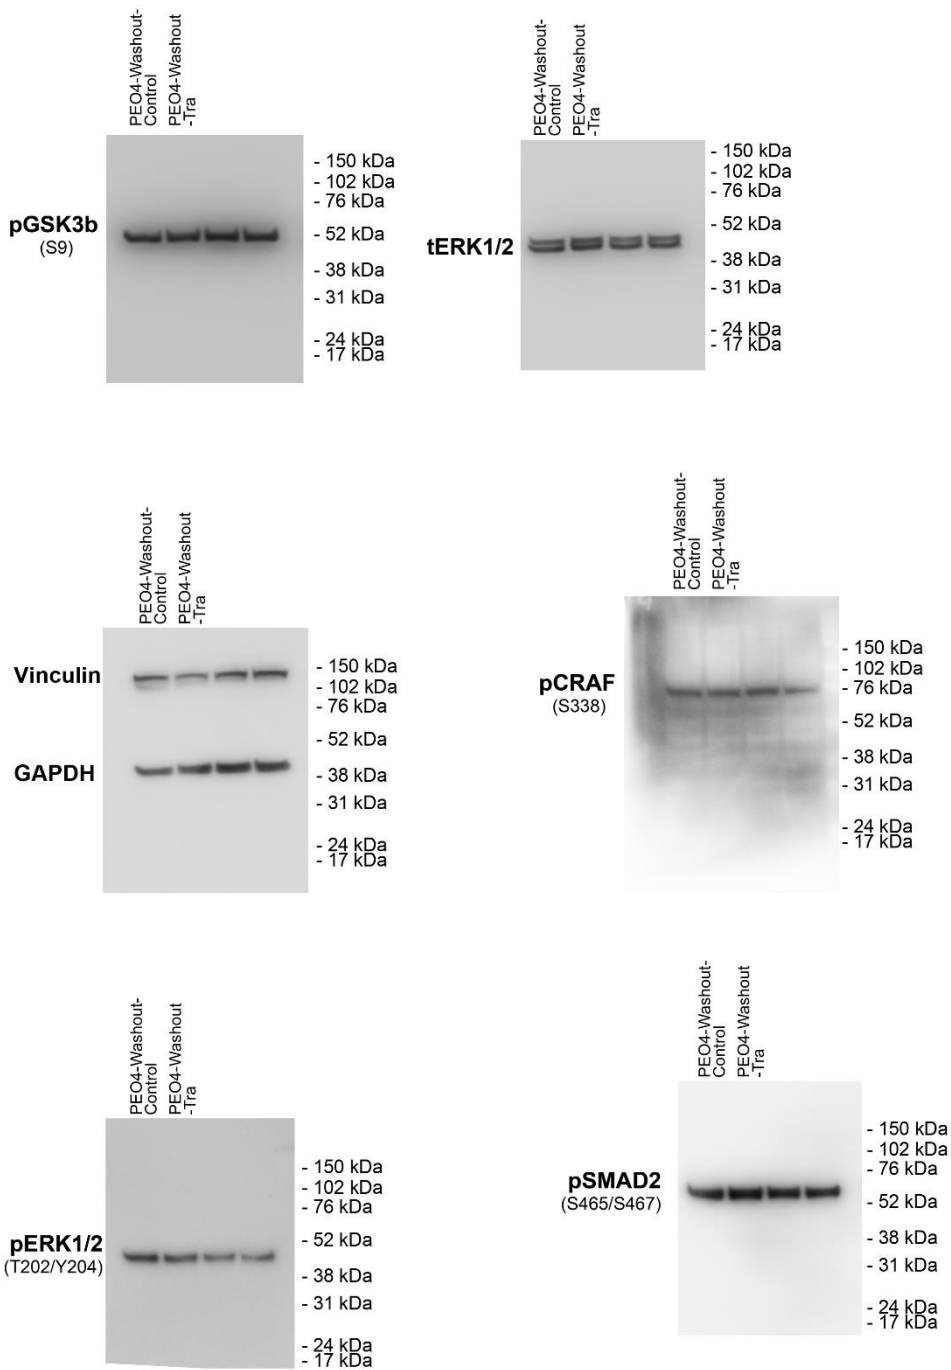

Figure S5.

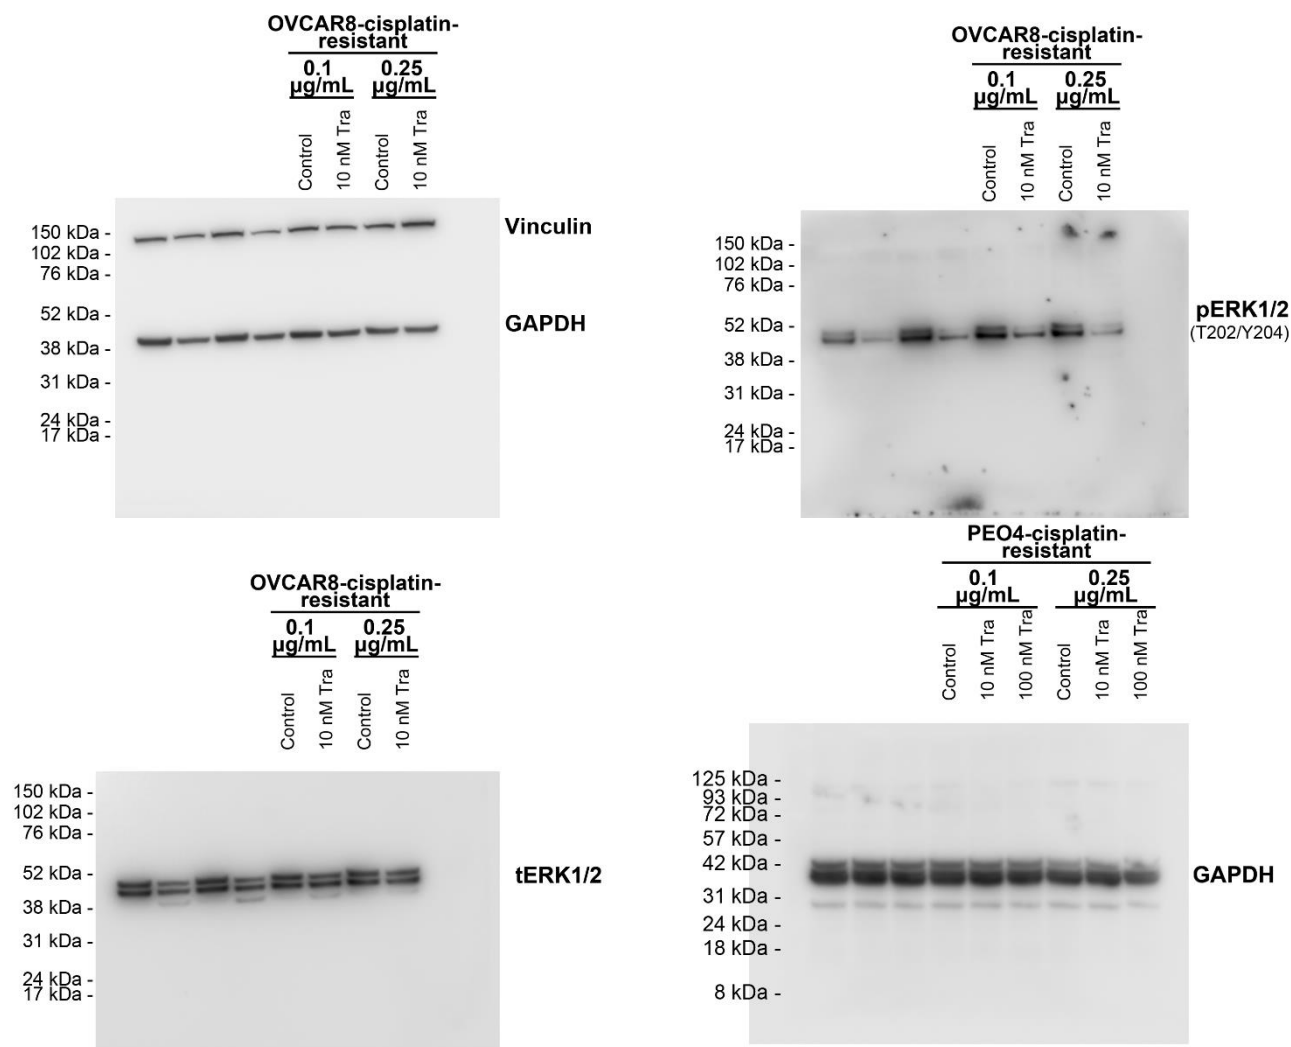

Figure S5 (Continued).

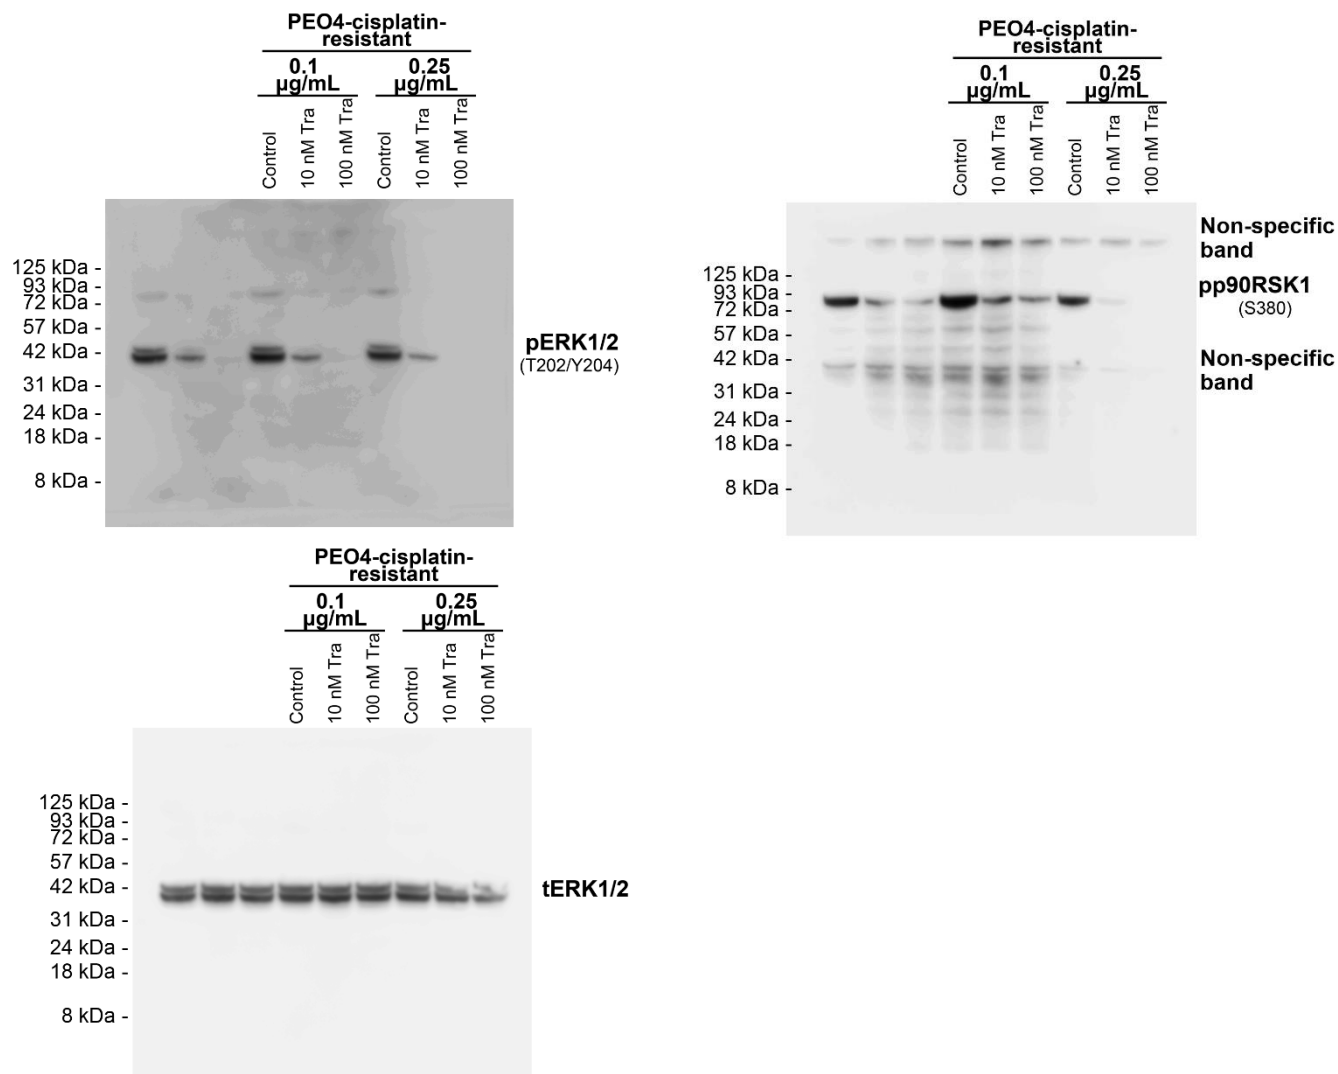

Figure S12B.

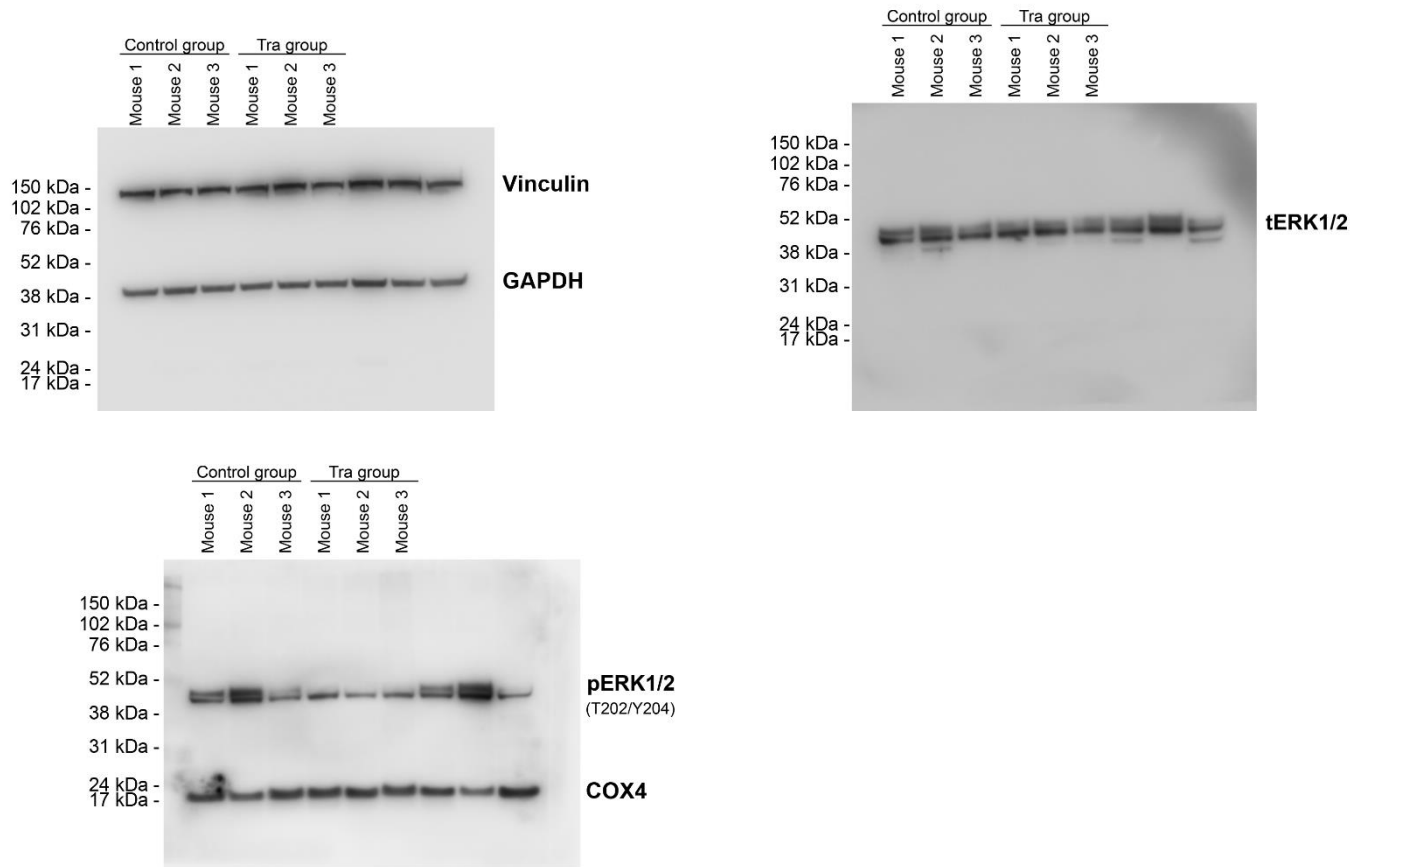

Supplement: Supplementary file 1 [file cancers-13-01369-s001.pdf]
